# Supplementary material
Source: HighWire-hosted journal article supplement (https://oem.bmj.com/content/76/6/398)
Supplement: inline-supplementary-material-1 [file inline-supplementary-material-1.pdf]

**Supplement Table 1. Within- and Between- Group Variance for Three Exposure Metrics (Mean, Bias-Corrected Mean, Median)**

| Exposure Variable       | <u>JEM Mean</u> |         |                | <u>JEM-Bias-Corrected Mean</u> |         |                | <u>JEM-Median</u> |         |                |
|-------------------------|-----------------|---------|----------------|--------------------------------|---------|----------------|-------------------|---------|----------------|
|                         | Within          | Between | R <sup>2</sup> | Within                         | Between | R <sup>2</sup> | Within            | Between | R <sup>2</sup> |
| Physical intensity      | 6.13            | 492.03  | 0.41           | 7.62                           | 1193.55 | 0.57           | 6.73              | 764.15  | 0.49           |
| Stand                   | 0.55            | 93.03   | 0.57           | 0.70                           | 161.44  | 0.64           | 0.67              | 132.78  | 0.60           |
| Repetition              | 0.97            | 26.61   | 0.19           | 1.43                           | 137.88  | 0.46           | 1.27              | 80.82   | 0.36           |
| Change tasks            | 1.11            | 16.18   | 0.11           | 1.71                           | 144.20  | 0.42           | 1.31              | 58.41   | 0.28           |
| Rest eyes               | 1.00            | 39.83   | 0.22           | 1.40                           | 177.84  | 0.48           | 1.29              | 130.31  | 0.42           |
| Kneel or squat          | 0.51            | 43.37   | 0.40           | 0.67                           | 107.32  | 0.56           | 0.60              | 62.55   | 0.45           |
| Bend trunk              | 0.62            | 44.41   | 0.35           | 0.83                           | 126.28  | 0.53           | 0.75              | 83.02   | 0.45           |
| Drive machinery         | 0.15            | 8.27    | 0.30           | 0.22                           | 25.60   | 0.48           | 0.19              | 5.93    | 0.20           |
| Drive car or truck      | 0.49            | 36.96   | 0.37           | 0.67                           | 96.65   | 0.53           | 0.59              | 53.57   | 0.41           |
| Handle objects 1-4 kg   | 1.34            | 109.85  | 0.38           | 1.72                           | 283.32  | 0.55           | 1.70              | 213.50  | 0.48           |
| Handle objects >4 kg    | 0.91            | 79.93   | 0.42           | 1.15                           | 191.49  | 0.57           | 1.11              | 129.05  | 0.49           |
| Carry loads <10 kg      | 0.83            | 61.99   | 0.38           | 1.08                           | 163.83  | 0.55           | 1.02              | 93.17   | 0.43           |
| Carry loads 10-25 kg    | 0.54            | 44.04   | 0.40           | 0.72                           | 112.27  | 0.56           | 0.66              | 61.09   | 0.43           |
| Carry loads > 25 kg     | 0.41            | 34.45   | 0.41           | 0.54                           | 83.24   | 0.56           | 0.50              | 44.38   | 0.42           |
| Use vibrating tools     | 0.16            | 8.60    | 0.31           | 0.22                           | 27.73   | 0.51           | 0.18              | 8.48    | 0.27           |
| Use computer screen     | 0.55            | 98.82   | 0.57           | 0.68                           | 171.96  | 0.65           | 0.67              | 161.98  | 0.64           |
| Use keyboard or scanner | 0.61            | 89.89   | 0.54           | 0.77                           | 164.81  | 0.63           | 0.73              | 145.56  | 0.62           |
| Bend neck               | 1.14            | 15.06   | 0.09           | 1.80                           | 168.31  | 0.40           | 1.27              | 50.23   | 0.22           |
| Arms above shoulder     | 0.41            | 18.97   | 0.24           | 0.58                           | 71.53   | 0.46           | 0.54              | 32.38   | 0.30           |
| Reach behind            | 0.30            | 2.35    | 0.06           | 0.51                           | 39.59   | 0.38           | 0.38              | 9.94    | 0.17           |
| Arms abducted           | 0.49            | 20.01   | 0.22           | 0.72                           | 91.07   | 0.47           | 0.61              | 28.77   | 0.25           |
| Bend elbow              | 0.55            | 24.77   | 0.23           | 0.79                           | 104.18  | 0.47           | 0.67              | 37.21   | 0.27           |
| Rotate forearm          | 0.26            | 18.51   | 0.33           | 0.35                           | 52.80   | 0.52           | 0.31              | 20.95   | 0.32           |
| Bend wrist              | 0.50            | 19.16   | 0.21           | 0.72                           | 89.55   | 0.47           | 0.60              | 29.63   | 0.26           |
| Press base of hand      | 0.19            | 7.90    | 0.23           | 0.26                           | 34.34   | 0.48           | 0.21              | 7.22    | 0.19           |
| Finger pinch            | 0.69            | 14.50   | 0.13           | 1.08                           | 112.92  | 0.42           | 0.87              | 36.91   | 0.23           |
| Work outdoors           | 0.39            | 35.68   | 0.38           | 0.53                           | 94.92   | 0.54           | 0.49              | 54.61   | 0.42           |

**Supplement Table 2. Comparison Between Individual-Level Reports and JEM-Assigned Exposure Values Using Three Exposure Metrics.**

| Exposure Variable       | N     | JEM Mean              |                       |                       | JEM-Bias-Corrected Mean |                       |                       | JEM-Median            |                       |                       |
|-------------------------|-------|-----------------------|-----------------------|-----------------------|-------------------------|-----------------------|-----------------------|-----------------------|-----------------------|-----------------------|
|                         |       | MeanDiff <sup>1</sup> | Absolute <sup>2</sup> | Variance <sup>3</sup> | MeanDiff <sup>1</sup>   | Absolute <sup>2</sup> | Variance <sup>3</sup> | MeanDiff <sup>1</sup> | Absolute <sup>2</sup> | Variance <sup>3</sup> |
| Physical intensity      | 26821 | 0.002                 | 1.979                 | 6.060                 | -0.004                  | 2.022                 | 0.097                 | 0.234                 | 1.868                 | 3.802                 |
| Stand                   | 29597 | -0.001                | 0.591                 | 0.547                 | -0.008                  | 0.547                 | 0.020                 | -0.160                | 0.519                 | 0.266                 |
| Repetition              | 26424 | -0.002                | 0.791                 | 0.961                 | 0.007                   | 0.722                 | 0.001                 | 0.398                 | 0.643                 | 0.652                 |
| Change tasks            | 26581 | 0.001                 | 0.886                 | 1.098                 | 0.004                   | 0.922                 | 0.000                 | -0.199                | 0.847                 | 0.776                 |
| Rest eyes               | 31848 | 0.000                 | 0.823                 | 0.990                 | 0.003                   | 0.756                 | 0.002                 | -0.273                | 0.722                 | 0.417                 |
| Kneel or squat          | 29574 | 0.000                 | 0.492                 | 0.503                 | -0.001                  | 0.447                 | 0.009                 | 0.180                 | 0.405                 | 0.387                 |
| Bend trunk              | 30853 | -0.001                | 0.574                 | 0.610                 | -0.001                  | 0.511                 | 0.005                 | 0.178                 | 0.470                 | 0.357                 |
| Drive machinery         | 29385 | 0.000                 | 0.134                 | 0.151                 | 0.005                   | 0.112                 | 0.017                 | 0.081                 | 0.091                 | 0.176                 |
| Drive car or truck      | 29357 | 0.003                 | 0.435                 | 0.483                 | 0.007                   | 0.372                 | 0.019                 | 0.210                 | 0.321                 | 0.398                 |
| Handle objects 1-4 kg   | 31116 | 0.001                 | 0.878                 | 1.324                 | -0.050                  | 0.770                 | 0.055                 | 0.355                 | 0.701                 | 0.690                 |
| Handle objects >4 kg    | 28306 | 0.001                 | 0.678                 | 0.893                 | -0.004                  | 0.604                 | -0.006                | 0.267                 | 0.554                 | 0.569                 |
| Carry loads <10 kg      | 28240 | 0.000                 | 0.643                 | 0.816                 | -0.010                  | 0.587                 | -0.006                | 0.313                 | 0.520                 | 0.663                 |
| Carry loads 10-25 kg    | 28297 | 0.001                 | 0.510                 | 0.536                 | -0.012                  | 0.469                 | -0.013                | 0.242                 | 0.412                 | 0.457                 |
| Carry loads > 25 kg     | 28271 | 0.000                 | 0.442                 | 0.404                 | -0.007                  | 0.395                 | 0.011                 | 0.215                 | 0.349                 | 0.370                 |
| Use vibrating tools     | 28437 | 0.001                 | 0.143                 | 0.154                 | 0.000                   | 0.123                 | 0.001                 | 0.070                 | 0.098                 | 0.160                 |
| Use computer screen     | 31017 | 0.000                 | 0.503                 | 0.538                 | -0.008                  | 0.422                 | 0.001                 | -0.038                | 0.416                 | 0.075                 |
| Use keyboard or scanner | 28437 | 0.000                 | 0.536                 | 0.597                 | 0.002                   | 0.463                 | -0.003                | -0.095                | 0.439                 | 0.160                 |
| Bend neck               | 32048 | 0.000                 | 0.924                 | 1.129                 | 0.003                   | 1.002                 | 0.039                 | -0.089                | 0.882                 | 0.887                 |
| Arms above shoulder     | 32712 | 0.000                 | 0.440                 | 0.407                 | 0.005                   | 0.411                 | 0.041                 | 0.240                 | 0.353                 | 0.371                 |
| Reach behind            | 29482 | 0.000                 | 0.395                 | 0.301                 | -0.003                  | 0.374                 | 0.013                 | 0.251                 | 0.264                 | 0.305                 |
| Arms abducted           | 32634 | 0.000                 | 0.464                 | 0.487                 | -0.006                  | 0.422                 | -0.010                | 0.248                 | 0.357                 | 0.487                 |
| Bend elbow              | 33722 | 0.000                 | 0.491                 | 0.547                 | 0.004                   | 0.439                 | 0.010                 | 0.247                 | 0.375                 | 0.524                 |
| Rotate forearm          | 32647 | 0.001                 | 0.259                 | 0.258                 | 0.005                   | 0.222                 | 0.018                 | 0.137                 | 0.182                 | 0.259                 |
| Bend wrist              | 32599 | 0.000                 | 0.444                 | 0.492                 | 0.002                   | 0.395                 | -0.001                | 0.229                 | 0.326                 | 0.471                 |
| Press base of hand      | 33127 | 0.000                 | 0.187                 | 0.184                 | 0.006                   | 0.156                 | 0.003                 | 0.099                 | 0.123                 | 0.199                 |
| Finger pinch            | 33128 | 0.000                 | 0.588                 | 0.681                 | -0.007                  | 0.549                 | 0.004                 | 0.354                 | 0.422                 | 0.652                 |
| Work outdoors           | 35187 | 0.001                 | 0.393                 | 0.384                 | -0.003                  | 0.345                 | 0.000                 | 0.162                 | 0.297                 | 0.287                 |

<sup>1</sup>Mean differences between mean individual and JEM exposure estimates. <sup>2</sup>Differences of average absolute values between individual and JEM estimates. <sup>3</sup>Differences in variance between individual and JEM exposure estimates

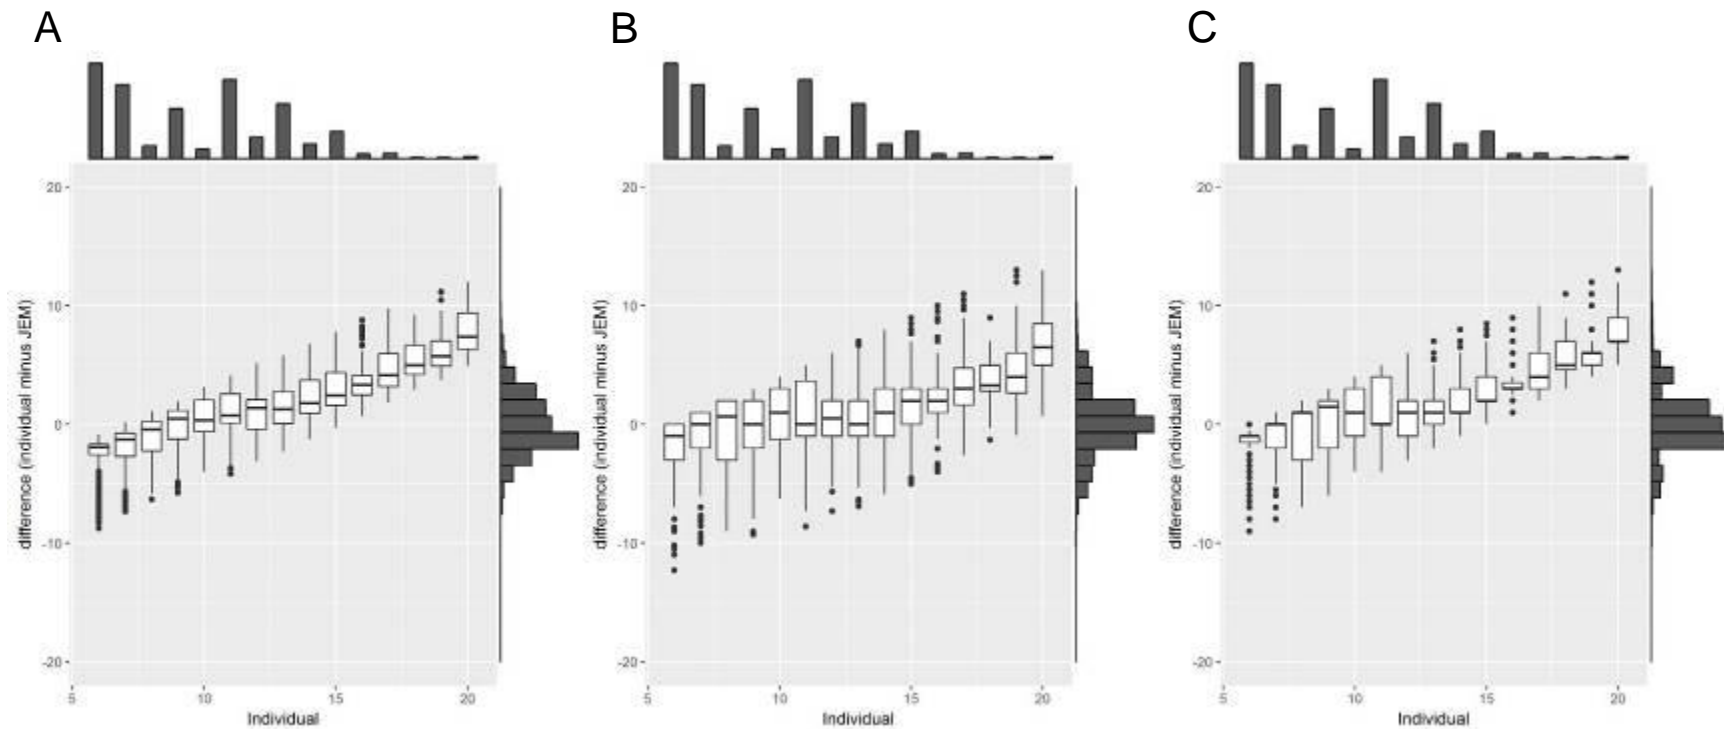

Supplement, Figure 1. Box-plots of the differences between individual-level reports and group-level exposure estimates (individual – JEM) at each exposure intensity level for three exposure metrics: (A) JEM Mean, (B) JEM Bias Corrected Mean, and (C) JEM Median. Distributions of individual (top axis) and JEM (right axis) are plotted. Bias-corrected mean determined using empirical quantile mapping methods (EQM). Exposure Variable: **Physical Intensity**

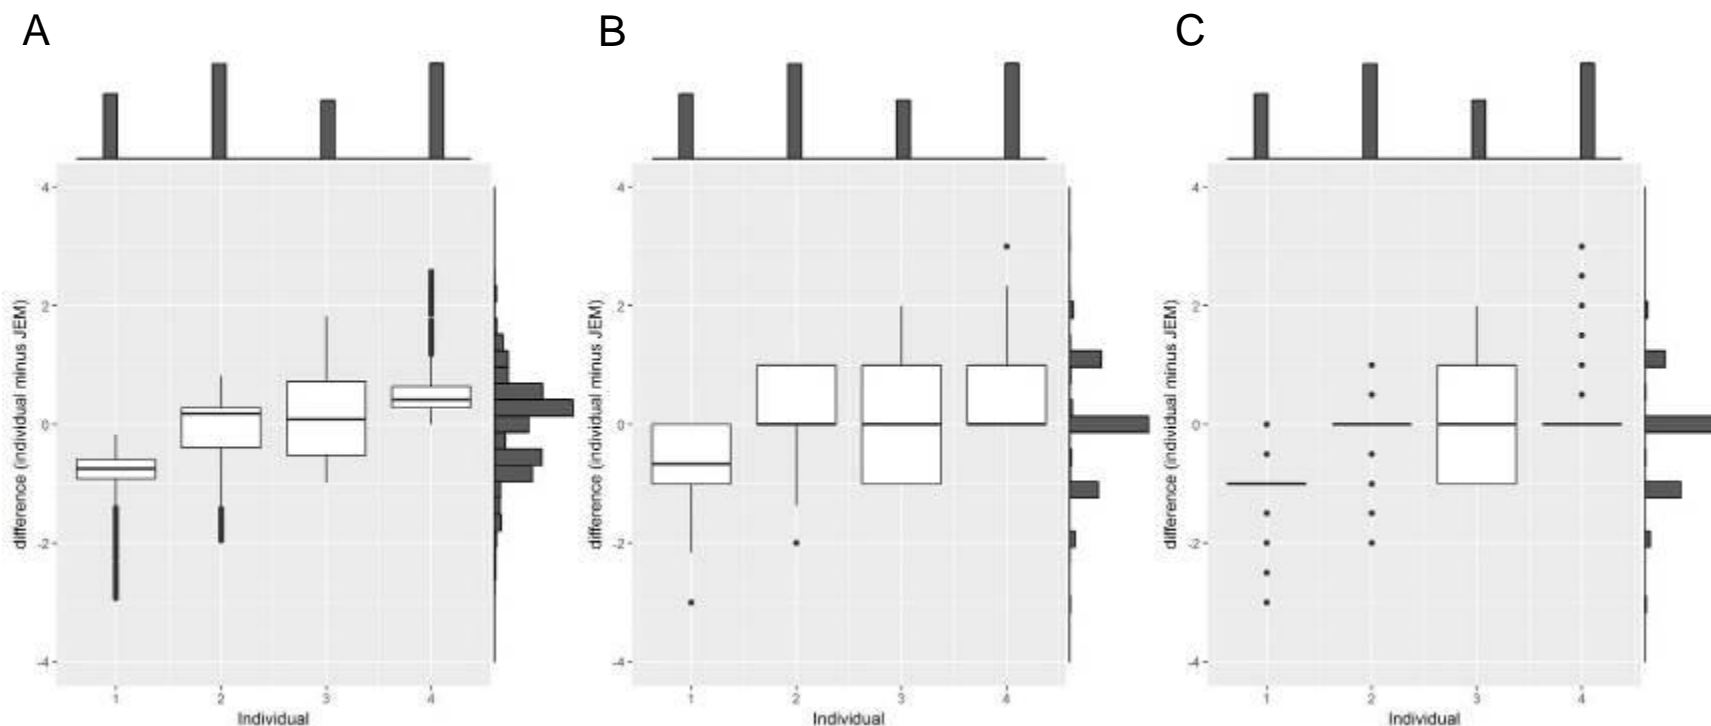

Supplement, Figure 2. Box-plots of the differences between individual-level reports and group-level exposure estimates (individual – JEM) at each exposure intensity level for three exposure metrics: (A) JEM Mean, (B) JEM Bias Corrected Mean, and (C) JEM Median. Distributions of individual (top axis) and JEM (right axis) are plotted. Bias-corrected mean determined using empirical quantile mapping methods (EQM). Exposure Variable: **Stand**

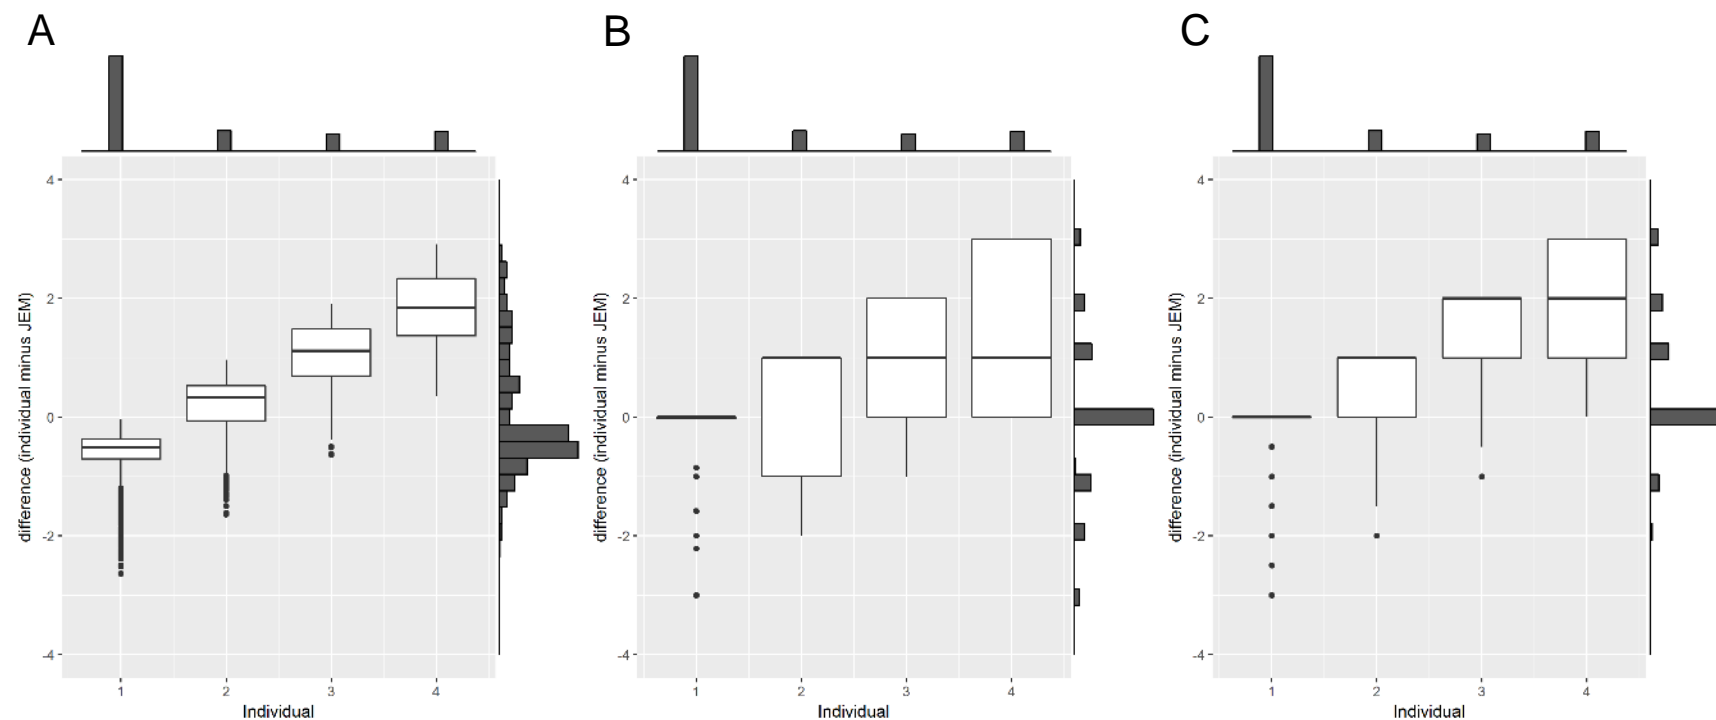

Supplement, Figure 3. Box-plots of the differences between individual-level reports and group-level exposure estimates (individual – JEM) at each exposure intensity level for three exposure metrics: (A) JEM Mean, (B) JEM Bias Corrected Mean, and (C) JEM Median. Distributions of individual (top axis) and JEM (right axis) are plotted. Bias-corrected mean determined using empirical quantile mapping methods (EQM). Exposure Variable: **Repetition**

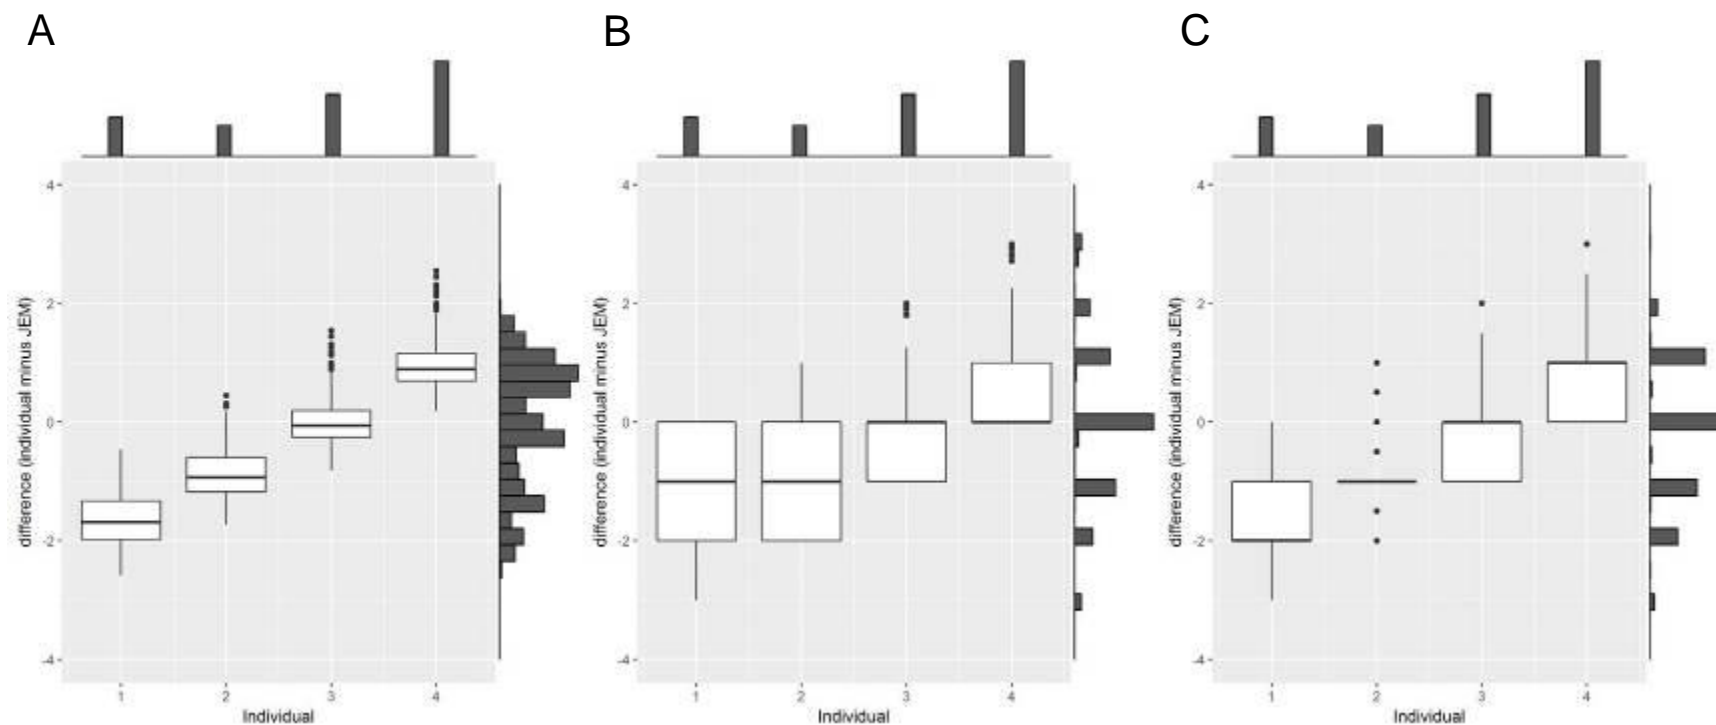

Supplement, Figure 4. Box-plots of the differences between individual-level reports and group-level exposure estimates (individual – JEM) at each exposure intensity level for three exposure metrics: (A) JEM Mean, (B) JEM Bias Corrected Mean, and (C) JEM Median. Distributions of individual (top axis) and JEM (right axis) are plotted. Bias-corrected mean determined using empirical quantile mapping methods (EQM). Exposure Variable: **Change Tasks**

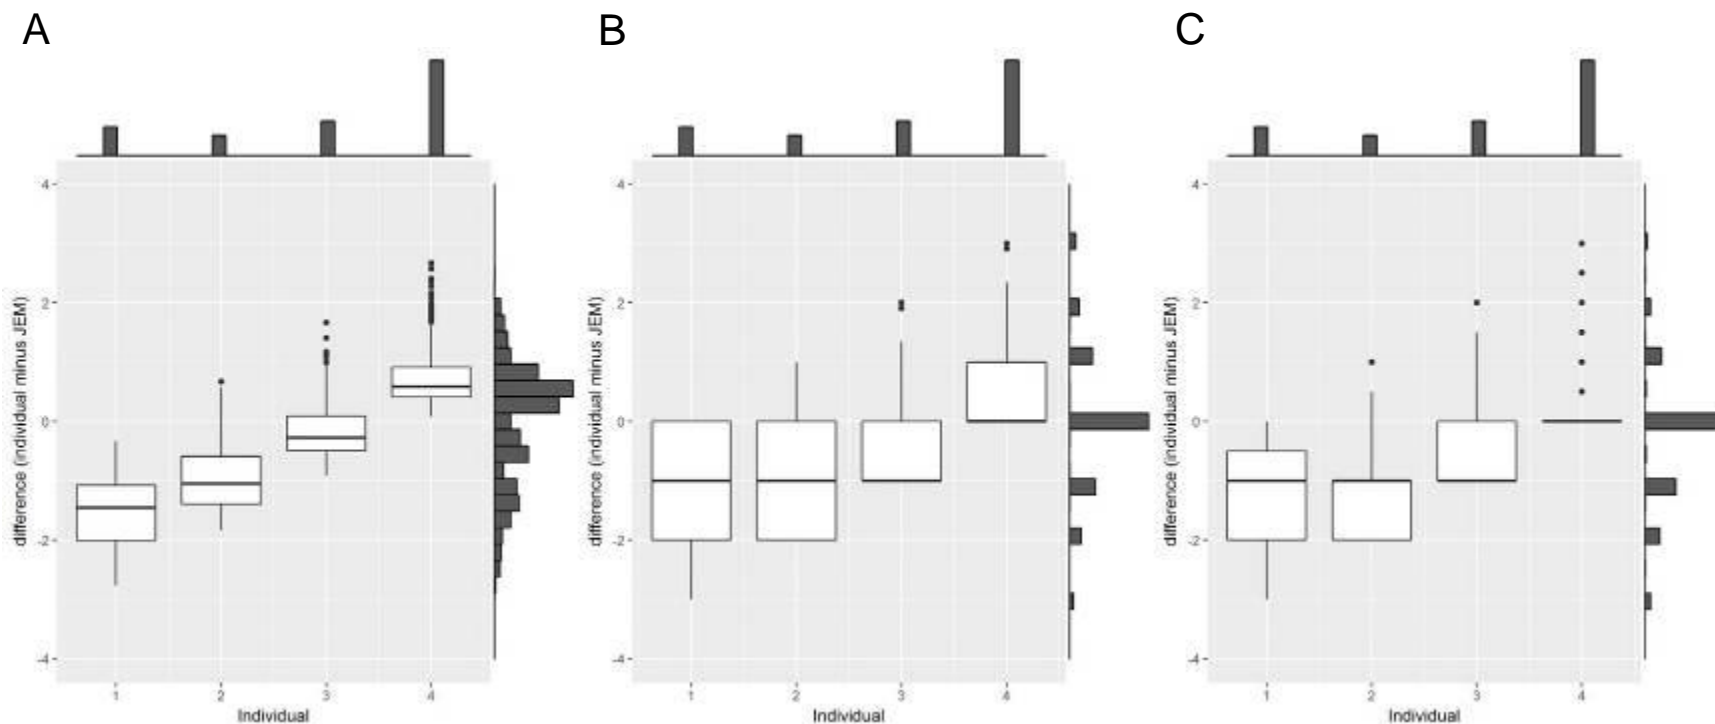

Supplement, Figure 5. Box-plots of the differences between individual-level reports and group-level exposure estimates (individual – JEM) at each exposure intensity level for three exposure metrics: (A) JEM Mean, (B) JEM Bias Corrected Mean, and (C) JEM Median. Distributions of individual (top axis) and JEM (right axis) are plotted. Bias-corrected mean determined using empirical quantile mapping methods (EQM). Exposure Variable: **Rest Eyes**

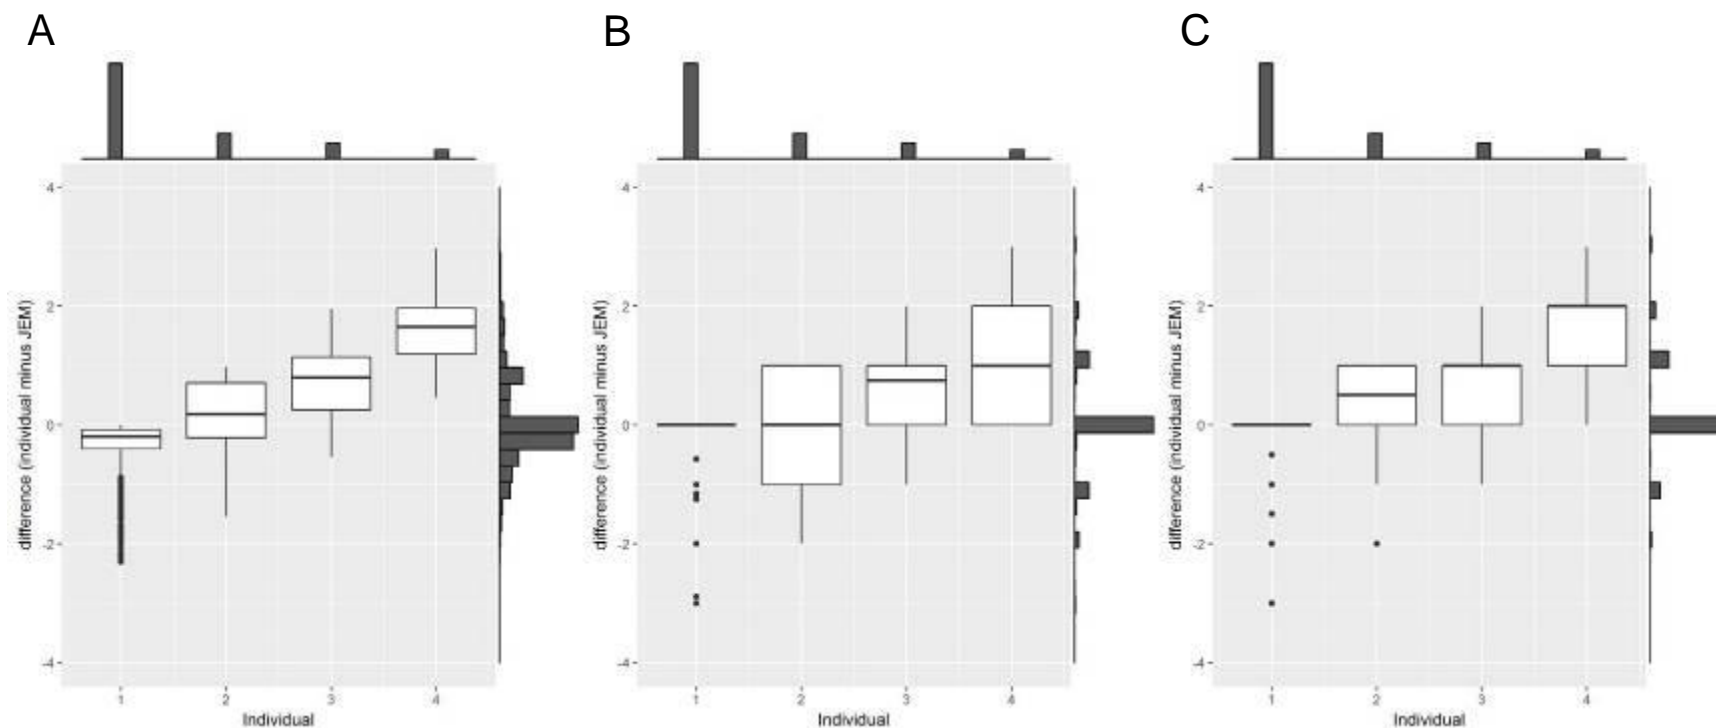

Supplement, Figure 6. Box-plots of the differences between individual-level reports and group-level exposure estimates (individual – JEM) at each exposure intensity level for three exposure metrics: (A) JEM Mean, (B) JEM Bias Corrected Mean, and (C) JEM Median. Distributions of individual (top axis) and JEM (right axis) are plotted. Bias-corrected mean determined using empirical quantile mapping methods (EQM). Exposure Variable: **Kneel or Squat**



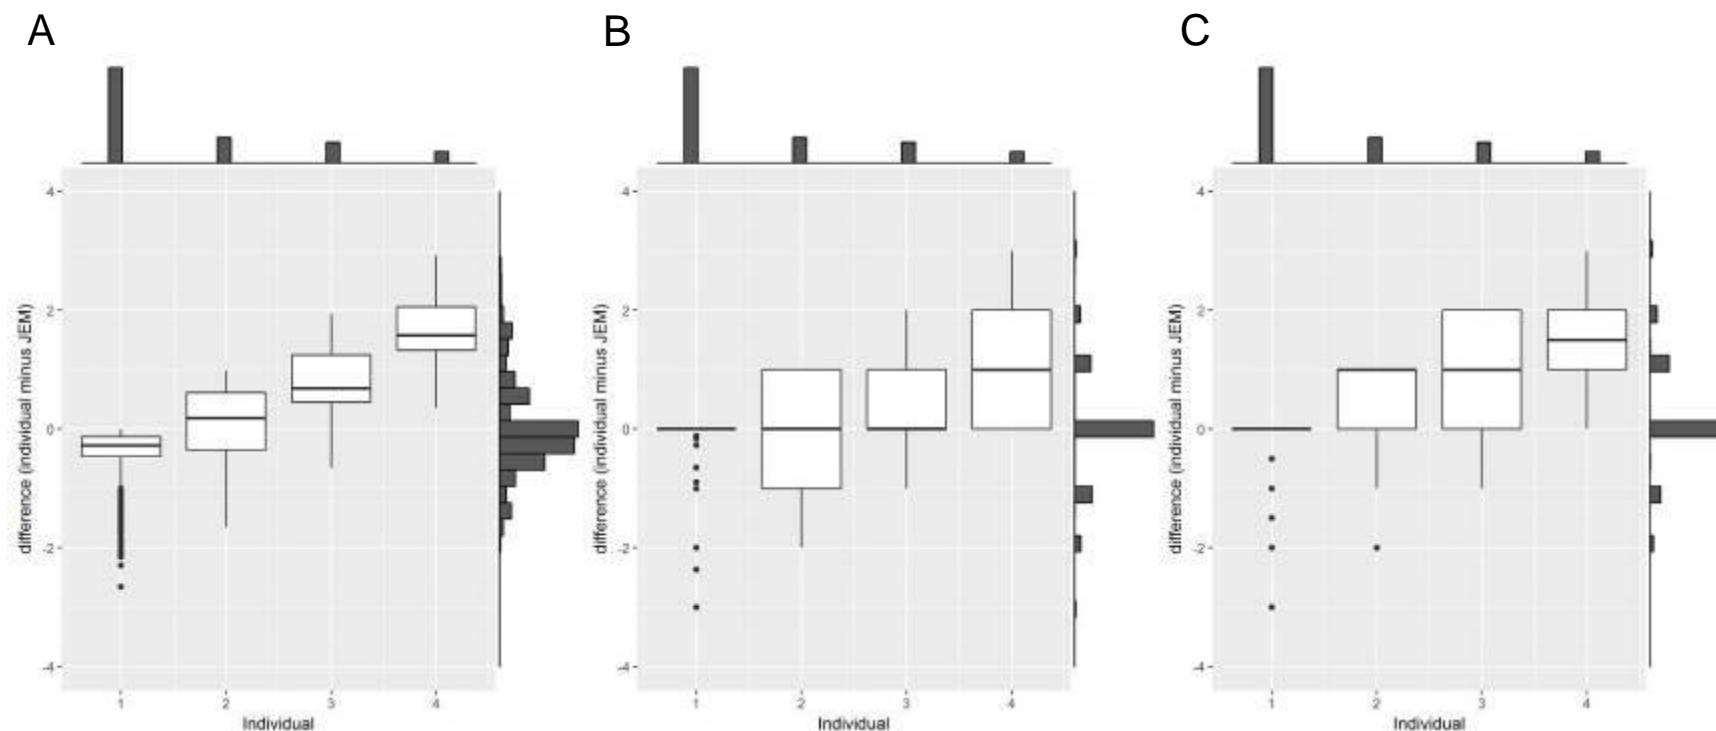

Supplement, Figure 7. Box-plots of the differences between individual-level reports and group-level exposure estimates (individual – JEM) at each exposure intensity level for three exposure metrics: (A) JEM Mean, (B) JEM Bias Corrected Mean, and (C) JEM Median. Distributions of individual (top axis) and JEM (right axis) are plotted. Bias-corrected mean determined using empirical quantile mapping methods (EQM). Exposure Variable: **Bend Trunk**

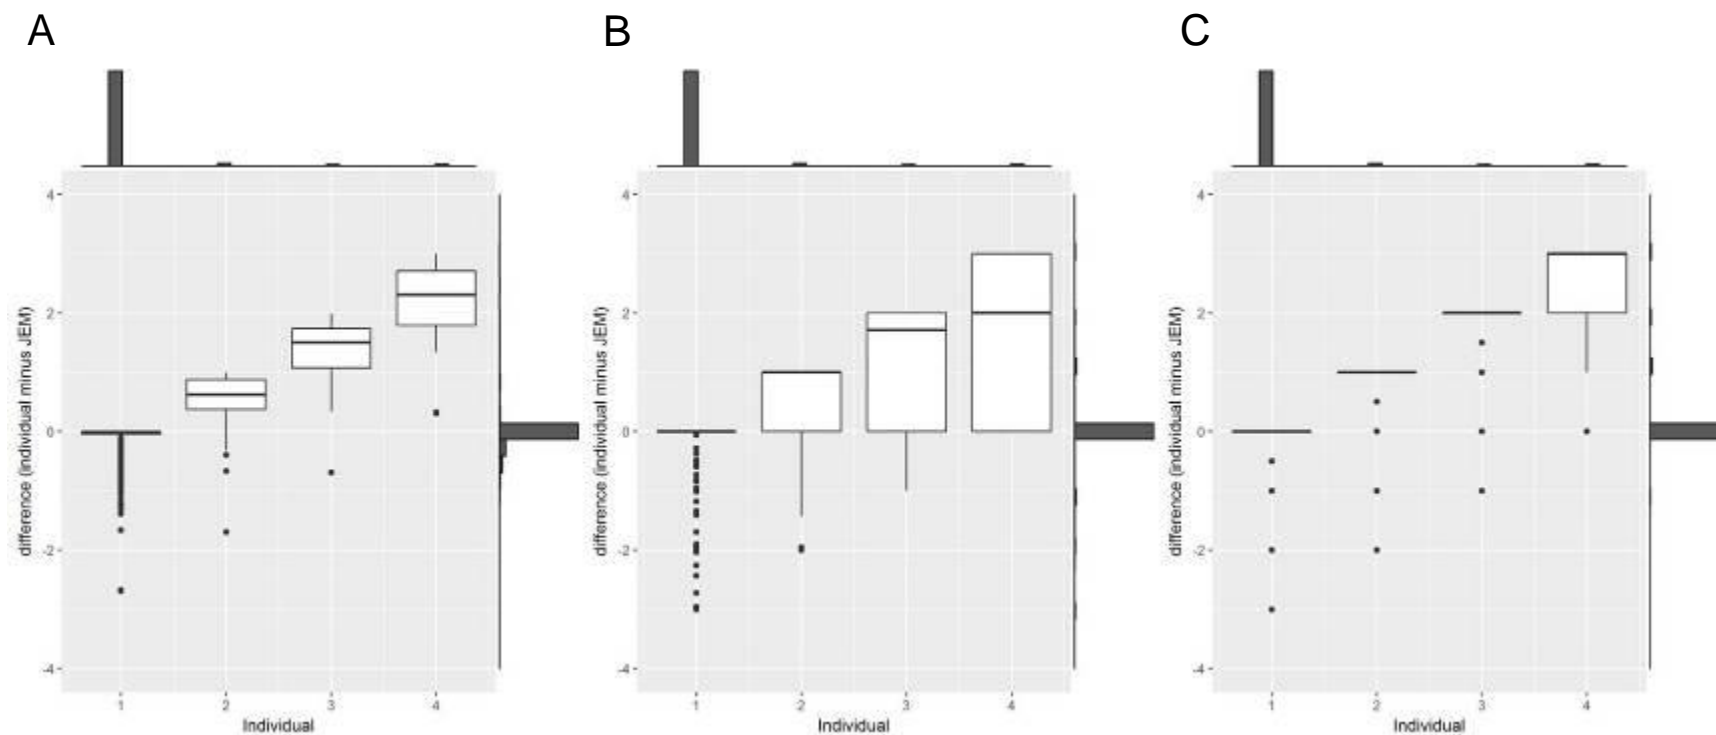

Supplement, Figure 8. Box-plots of the differences between individual-level reports and group-level exposure estimates (individual – JEM) at each exposure intensity level for three exposure metrics: (A) JEM Mean, (B) JEM Bias Corrected Mean, and (C) JEM Median. Distributions of individual (top axis) and JEM (right axis) are plotted. Bias-corrected mean determined using empirical quantile mapping methods (EQM). Exposure Variable: **Drive Machinery**

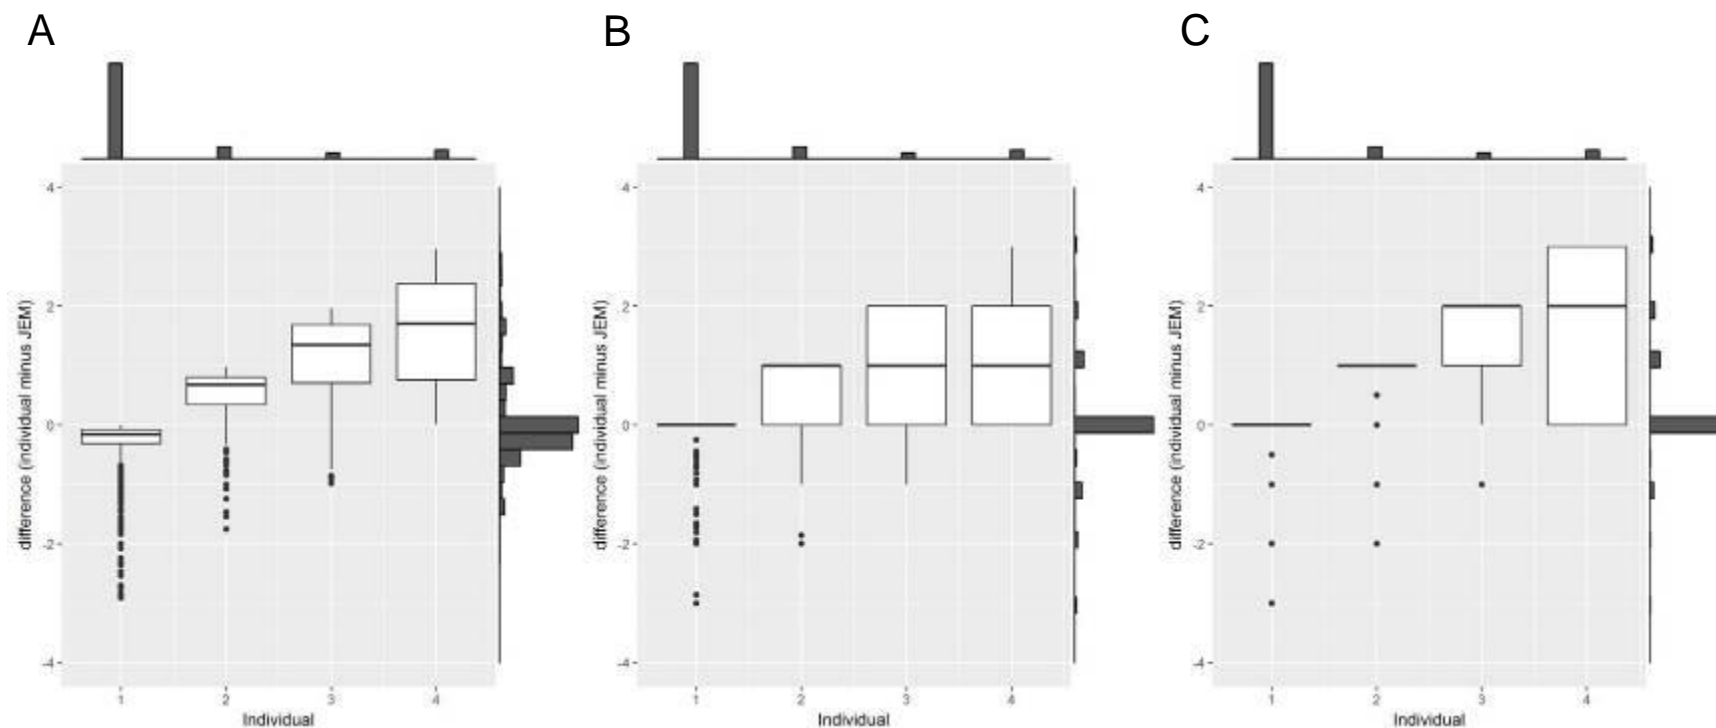

Supplement, Figure 9. Box-plots of the differences between individual-level reports and group-level exposure estimates (individual – JEM) at each exposure intensity level for three exposure metrics: (A) JEM Mean, (B) JEM Bias Corrected Mean, and (C) JEM Median. Distributions of individual (top axis) and JEM (right axis) are plotted. Bias-corrected mean determined using empirical quantile mapping methods (EQM). Exposure Variable: **Drive Car or Truck**

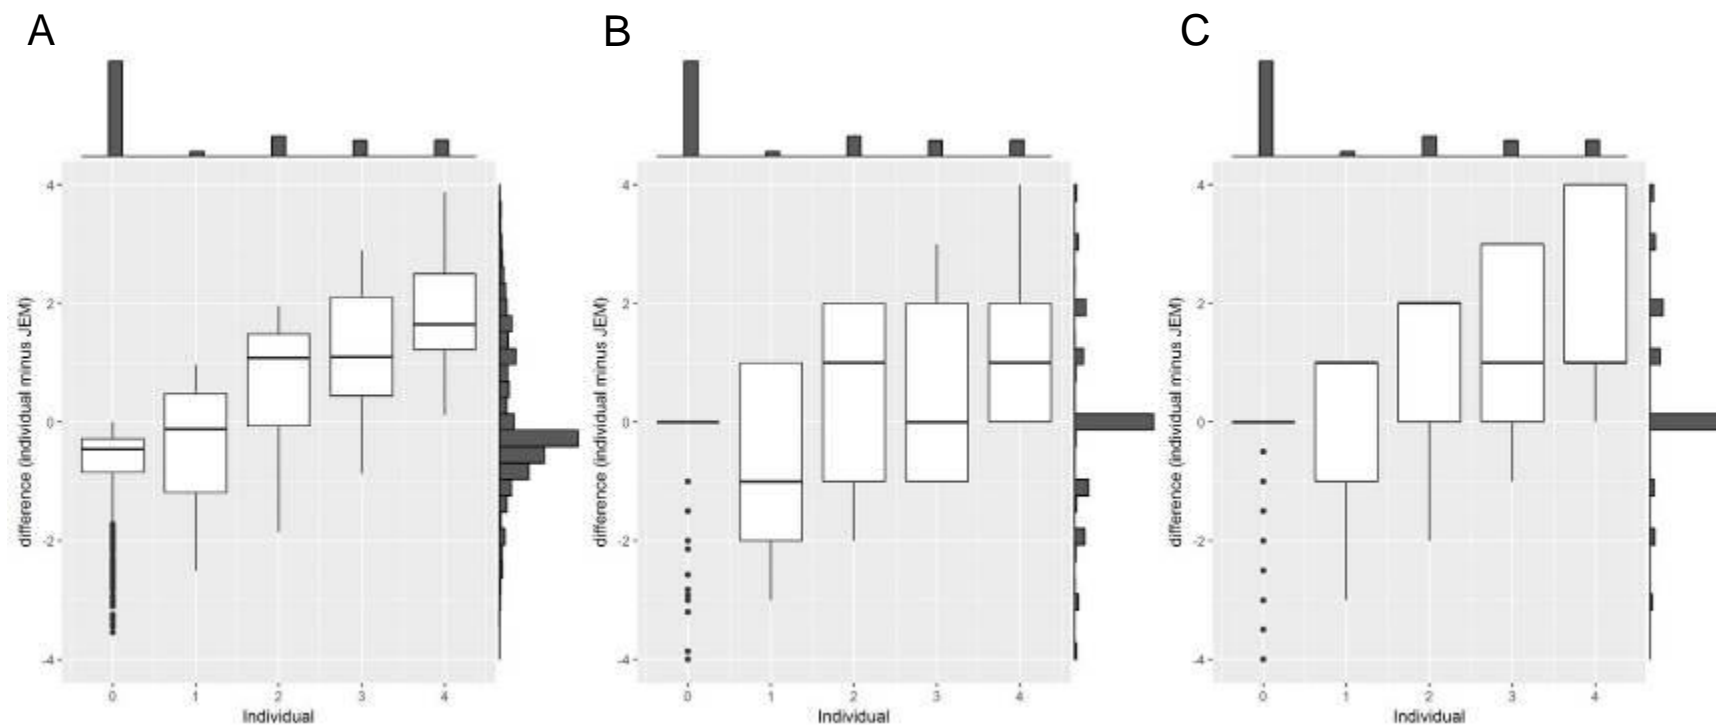

Supplement, Figure 10. Box-plots of the differences between individual-level reports and group-level exposure estimates (individual – JEM) at each exposure intensity level for three exposure metrics: (A) JEM Mean, (B) JEM Bias Corrected Mean, and (C) JEM Median. Distributions of individual (top axis) and JEM (right axis) are plotted. Bias-corrected mean determined using empirical quantile mapping methods (EQM). Exposure Variable: **Handle Objects 1-4 kg**

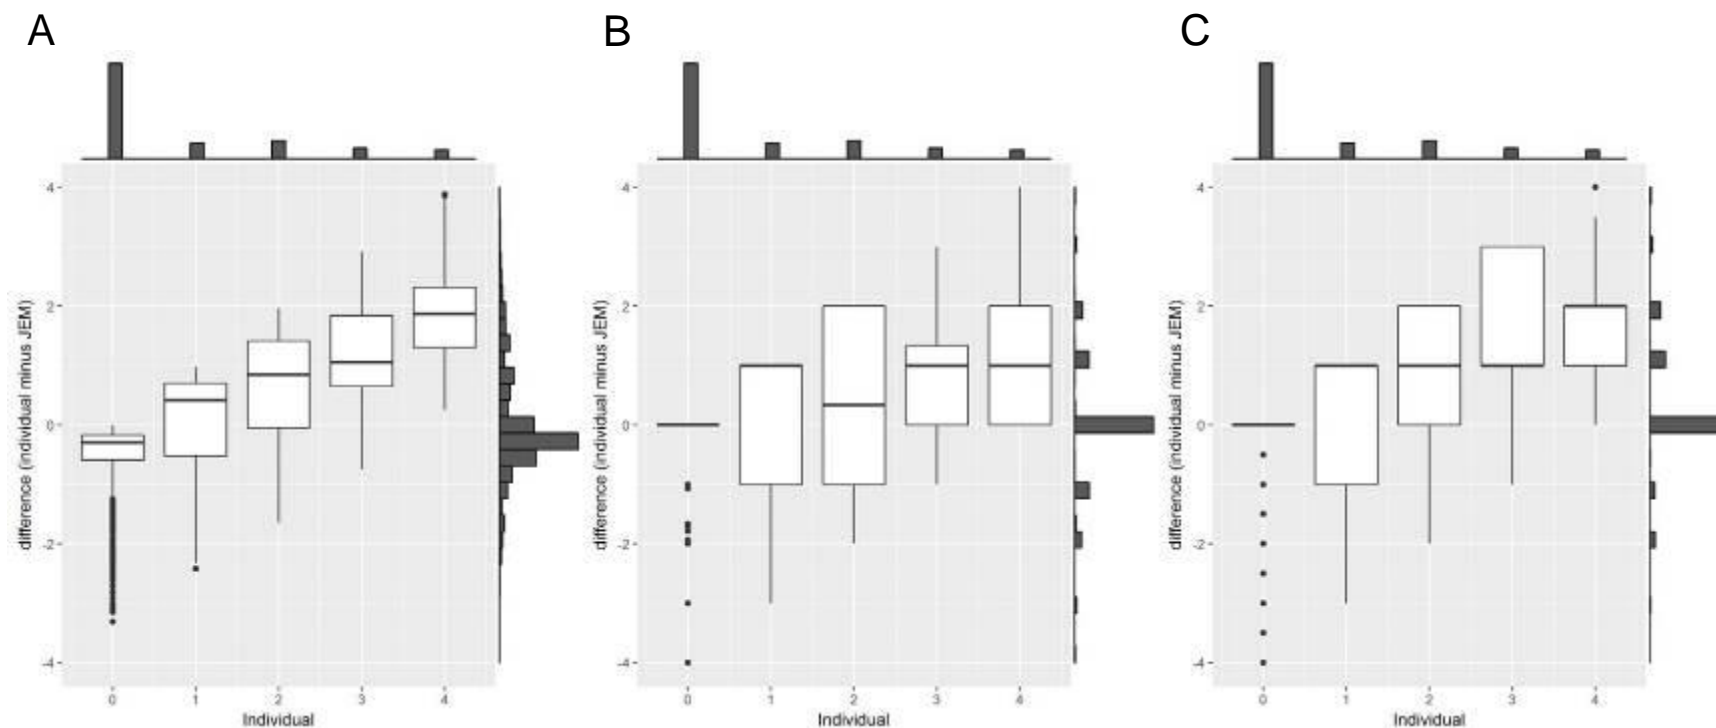

Supplement, Figure 11. Box-plots of the differences between individual-level reports and group-level exposure estimates (individual – JEM) at each exposure intensity level for three exposure metrics: (A) JEM Mean, (B) JEM Bias Corrected Mean, and (C) JEM Median. Distributions of individual (top axis) and JEM (right axis) are plotted. Bias-corrected mean determined using empirical quantile mapping methods (EQM). Exposure Variable: **Handle Objects > 4 kg**

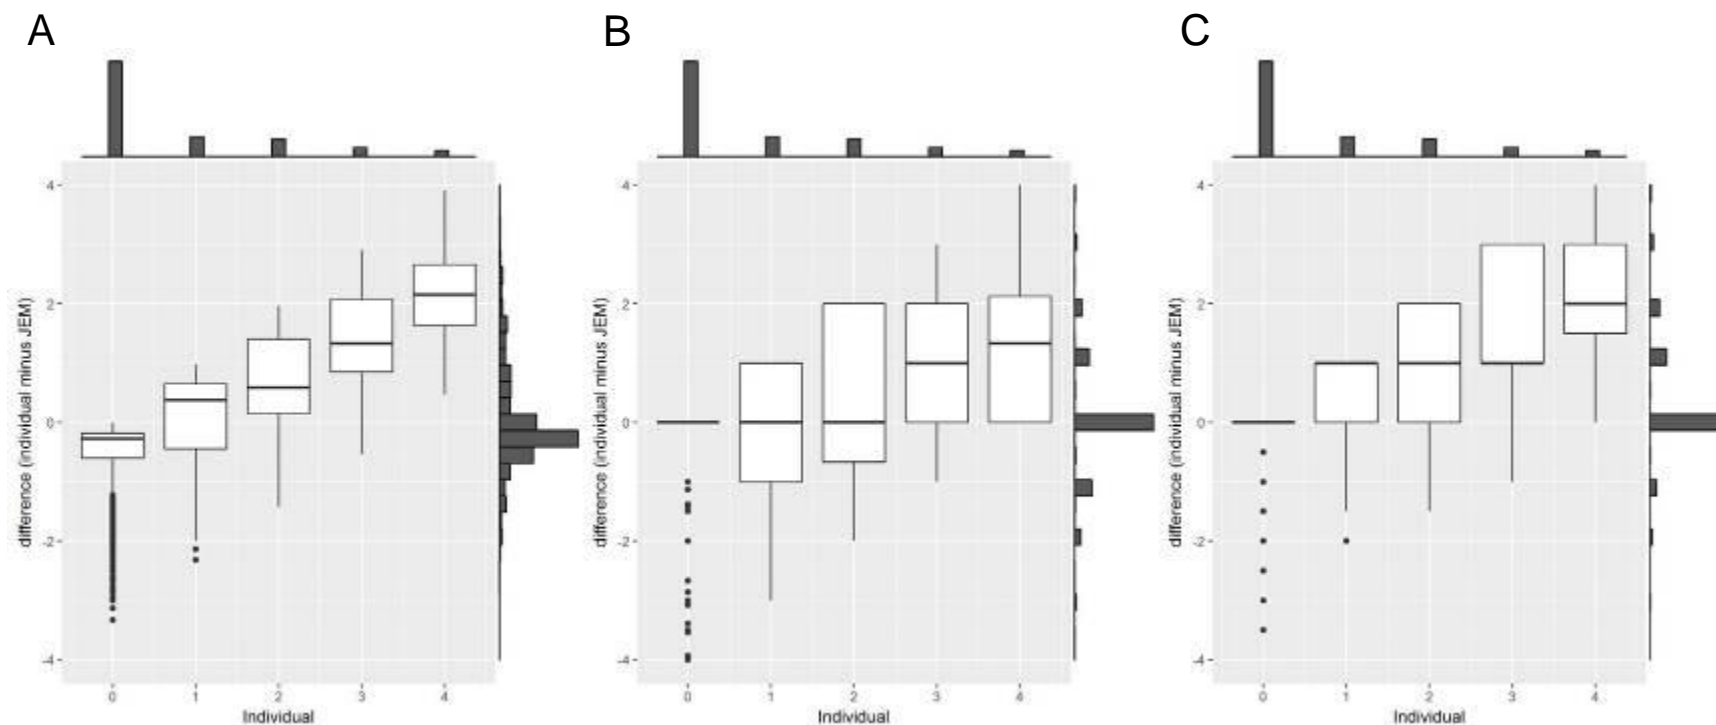

Supplement, Figure 12. Box-plots of the differences between individual-level reports and group-level exposure estimates (individual – JEM) at each exposure intensity level for three exposure metrics: (A) JEM Mean, (B) JEM Bias Corrected Mean, and (C) JEM Median. Distributions of individual (top axis) and JEM (right axis) are plotted. Bias-corrected mean determined using empirical quantile mapping methods (EQM). Exposure Variable: **Carry Loads < 10 kg**

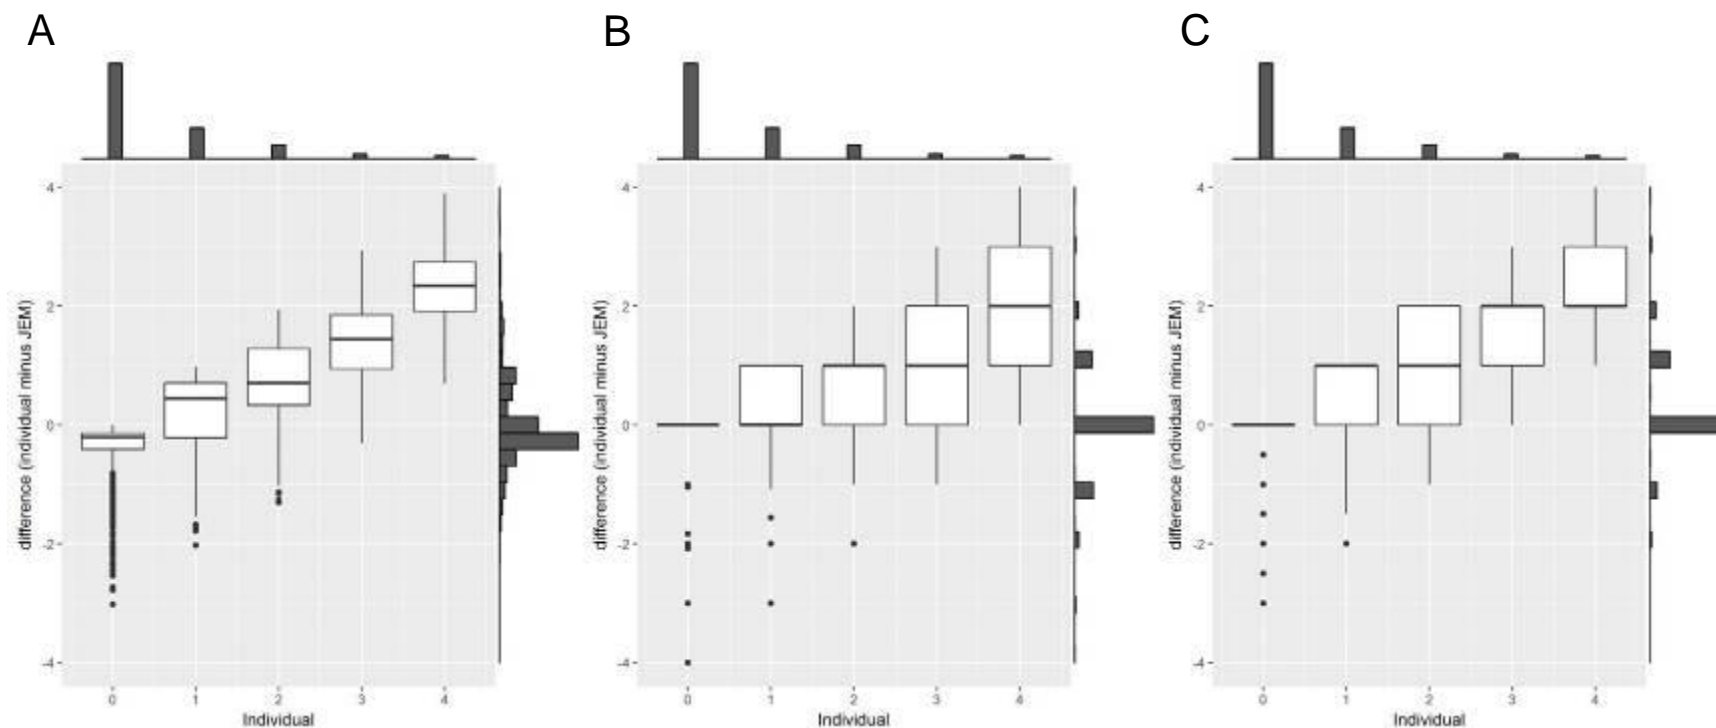

Supplement, Figure 13. Box-plots of the differences between individual-level reports and group-level exposure estimates (individual – JEM) at each exposure intensity level for three exposure metrics: (A) JEM Mean, (B) JEM Bias Corrected Mean, and (C) JEM Median. Distributions of individual (top axis) and JEM (right axis) are plotted. Bias-corrected mean determined using empirical quantile mapping methods (EQM). Exposure Variable: **Carry Loads 10 – 25 kg**

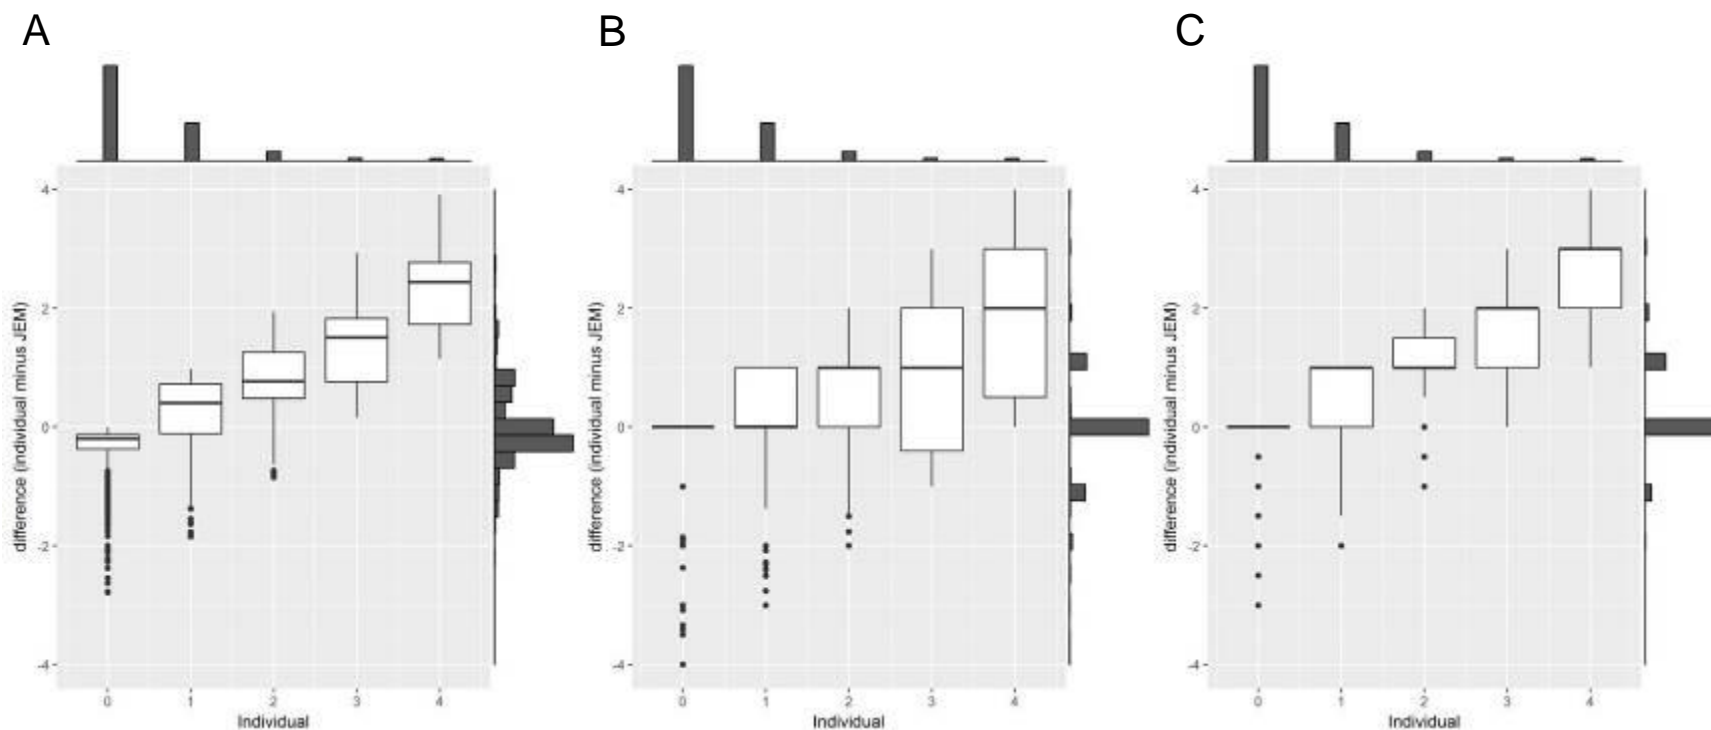

Supplement, Figure 14. Box-plots of the differences between individual-level reports and group-level exposure estimates (individual – JEM) at each exposure intensity level for three exposure metrics: (A) JEM Mean, (B) JEM Bias Corrected Mean, and (C) JEM Median. Distributions of individual (top axis) and JEM (right axis) are plotted. Bias-corrected mean determined using empirical quantile mapping methods (EQM). Exposure Variable: **Carry Loads > 25 kg**



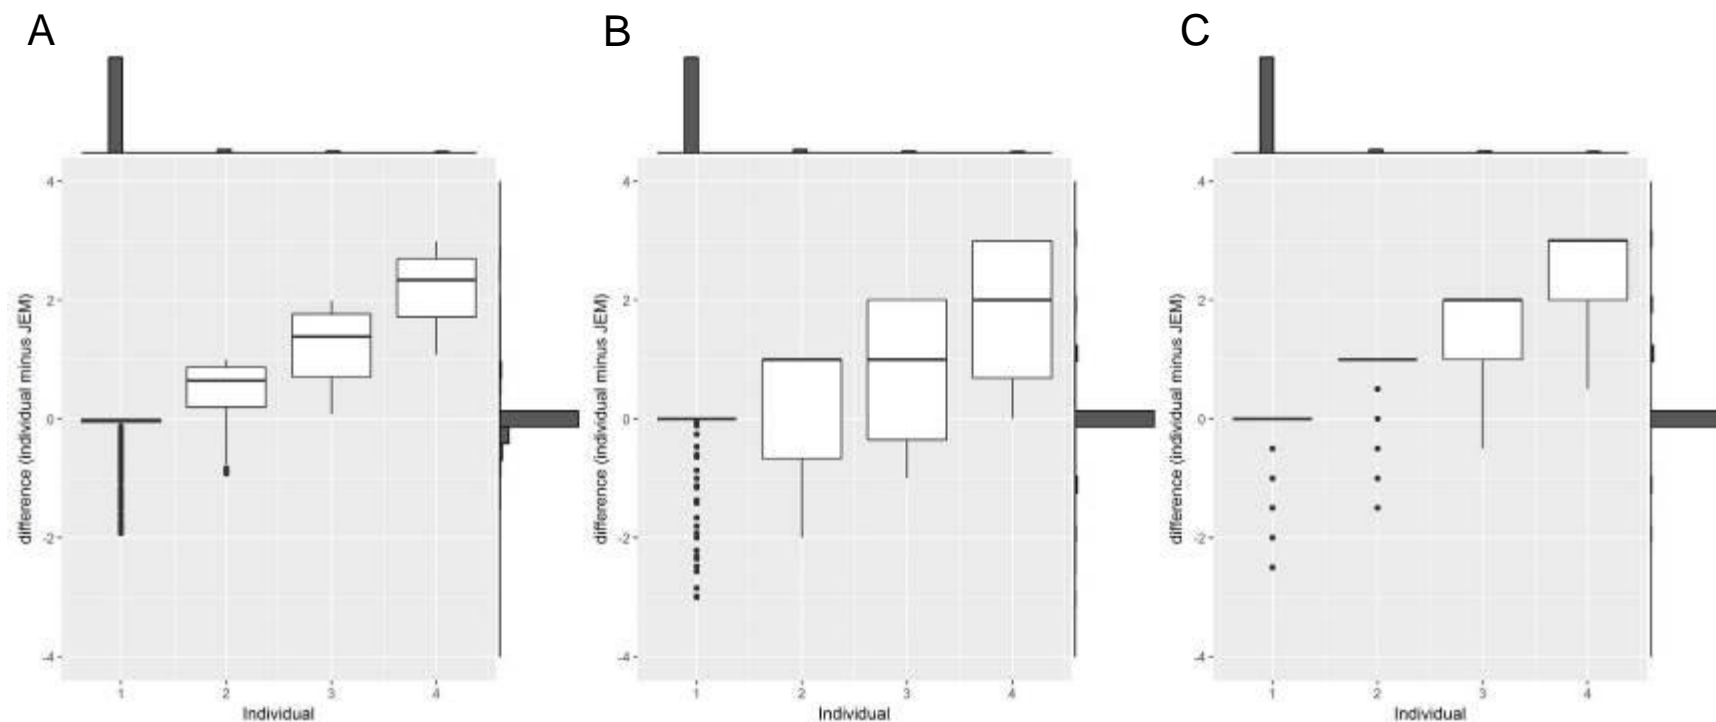

Supplement, Figure 15. Box-plots of the differences between individual-level reports and group-level exposure estimates (individual – JEM) at each exposure intensity level for three exposure metrics: (A) JEM Mean, (B) JEM Bias Corrected Mean, and (C) JEM Median. Distributions of individual (top axis) and JEM (right axis) are plotted. Bias-corrected mean determined using empirical quantile mapping methods (EQM). Exposure Variable: **Use Vibrating Tools**

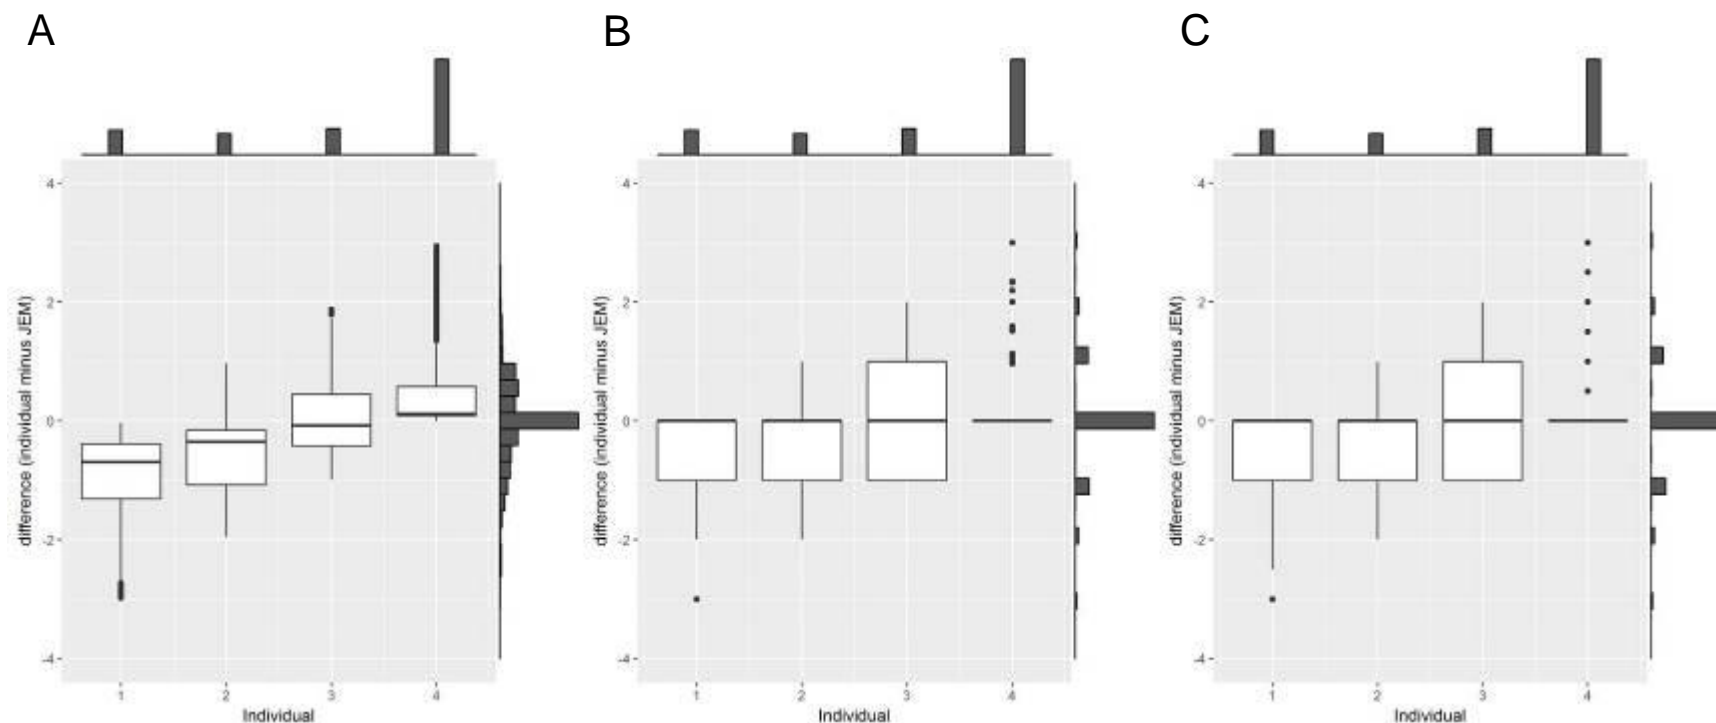

Supplement, Figure 16. Box-plots of the differences between individual-level reports and group-level exposure estimates (individual – JEM) at each exposure intensity level for three exposure metrics: (A) JEM Mean, (B) JEM Bias Corrected Mean, and (C) JEM Median. Distributions of individual (top axis) and JEM (right axis) are plotted. Bias-corrected mean determined using empirical quantile mapping methods (EQM). Exposure Variable: **Use Computer Screen**

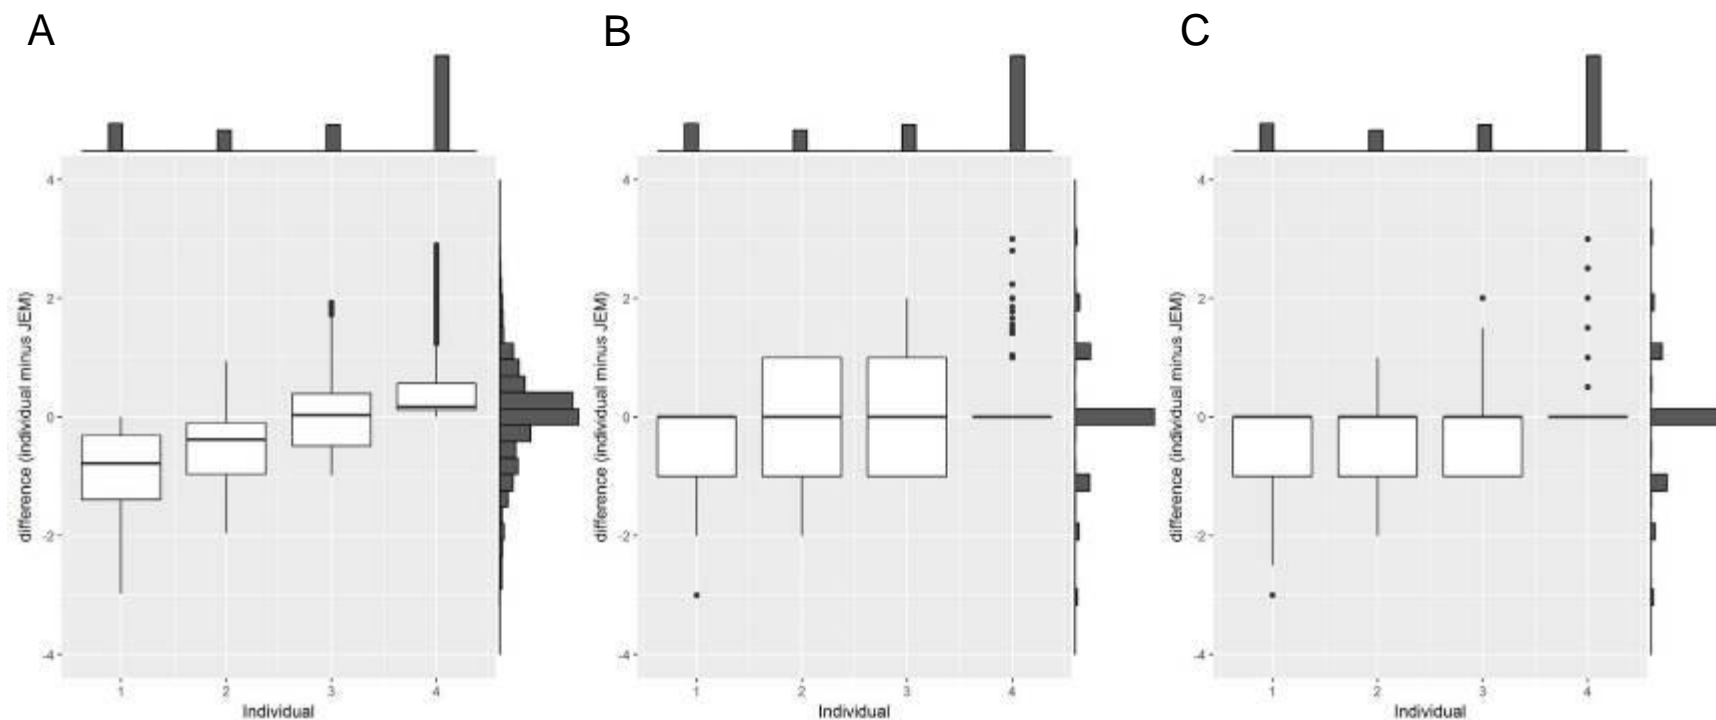

Supplement, Figure 17. Box-plots of the differences between individual-level reports and group-level exposure estimates (individual – JEM) at each exposure intensity level for three exposure metrics: (A) JEM Mean, (B) JEM Bias Corrected Mean, and (C) JEM Median. Distributions of individual (top axis) and JEM (right axis) are plotted. Bias-corrected mean determined using empirical quantile mapping methods (EQM). Exposure Variable: **Use Keyboard or Scanner**

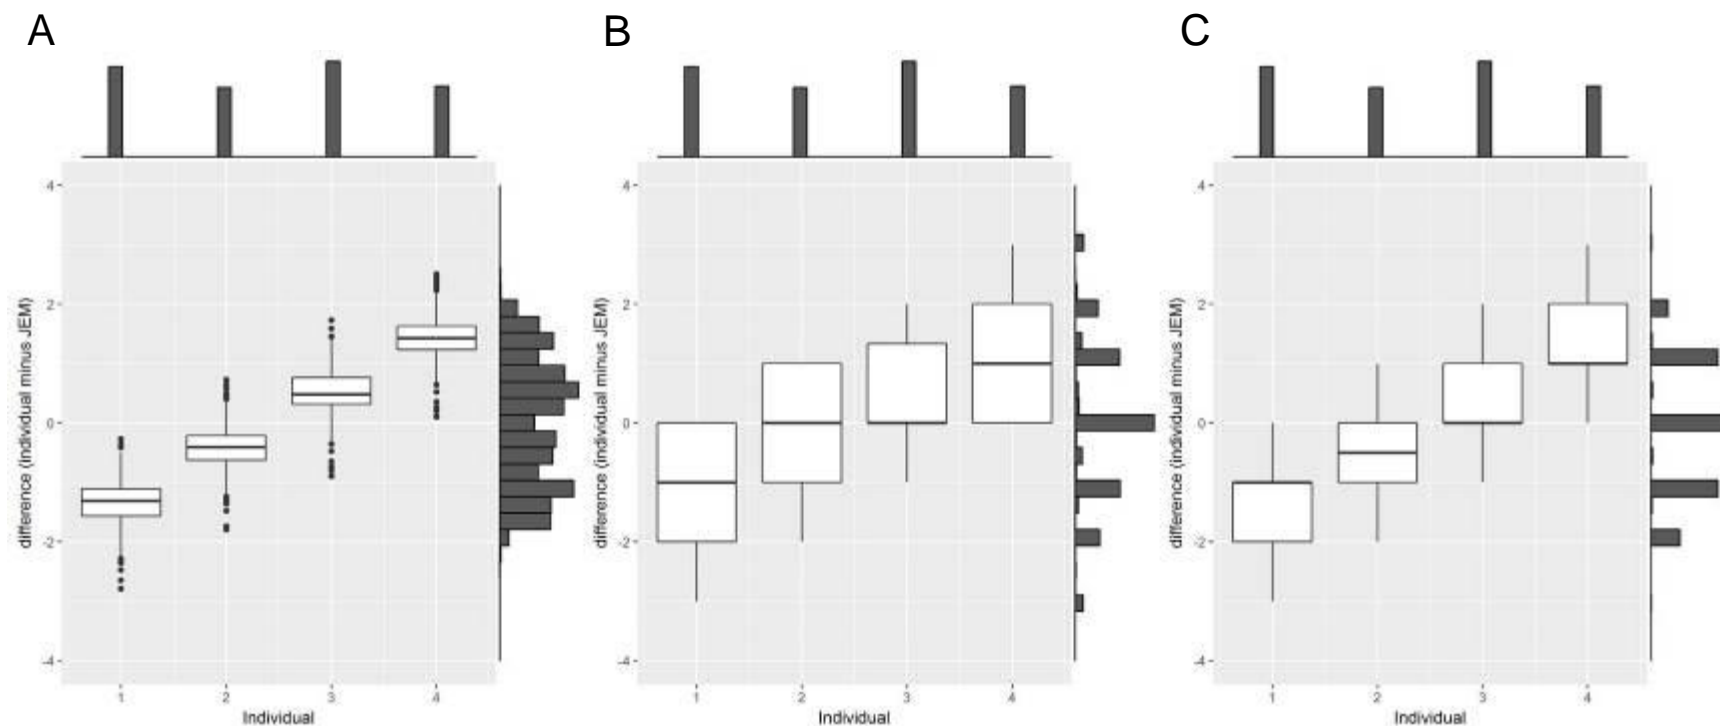

Supplement, Figure 18. Box-plots of the differences between individual-level reports and group-level exposure estimates (individual – JEM) at each exposure intensity level for three exposure metrics: (A) JEM Mean, (B) JEM Bias Corrected Mean, and (C) JEM Median. Distributions of individual (top axis) and JEM (right axis) are plotted. Bias-corrected mean determined using empirical quantile mapping methods (EQM). Exposure Variable: **Bend Neck**

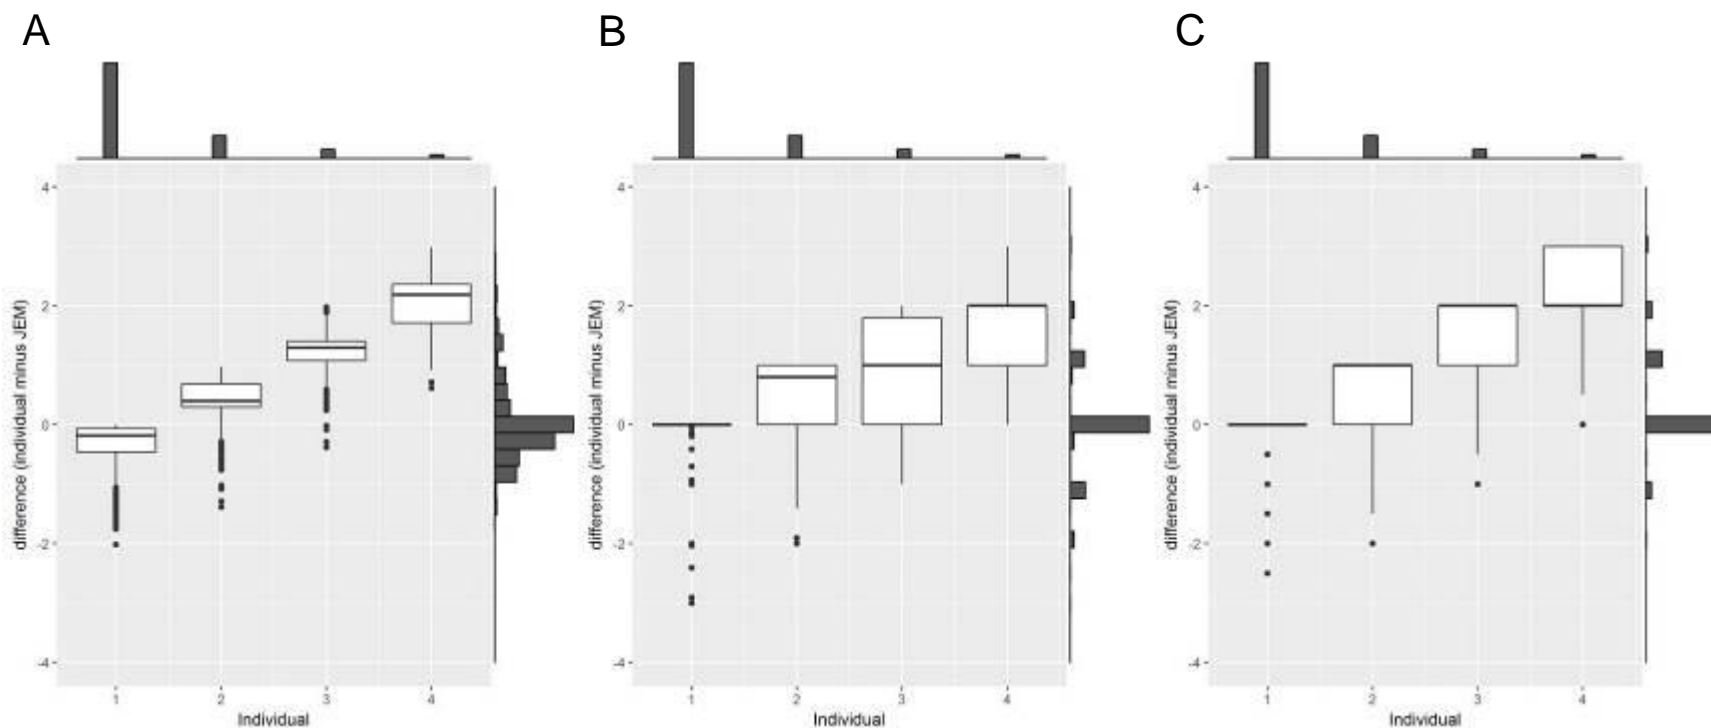

Supplement, Figure 19. Box-plots of the differences between individual-level reports and group-level exposure estimates (individual – JEM) at each exposure intensity level for three exposure metrics: (A) JEM Mean, (B) JEM Bias Corrected Mean, and (C) JEM Median. Distributions of individual (top axis) and JEM (right axis) are plotted. Bias-corrected mean determined using empirical quantile mapping methods (EQM). Exposure Variable: **Arms Above Shoulder**

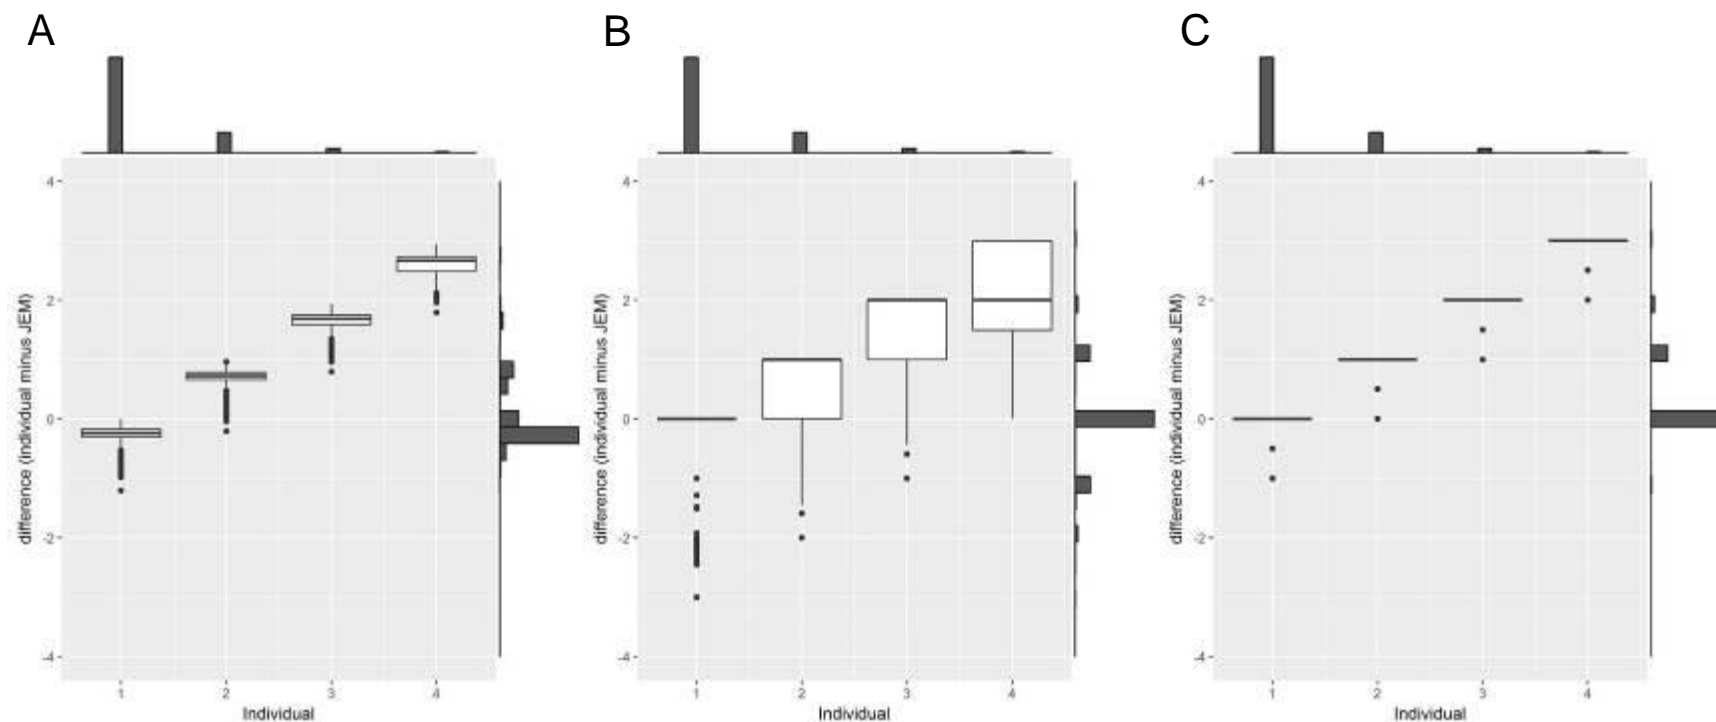

Supplement, Figure 20. Box-plots of the differences between individual-level reports and group-level exposure estimates (individual – JEM) at each exposure intensity level for three exposure metrics: (A) JEM Mean, (B) JEM Bias Corrected Mean, and (C) JEM Median. Distributions of individual (top axis) and JEM (right axis) are plotted. Bias-corrected mean determined using empirical quantile mapping methods (EQM). Exposure Variable: **Reach Behind**

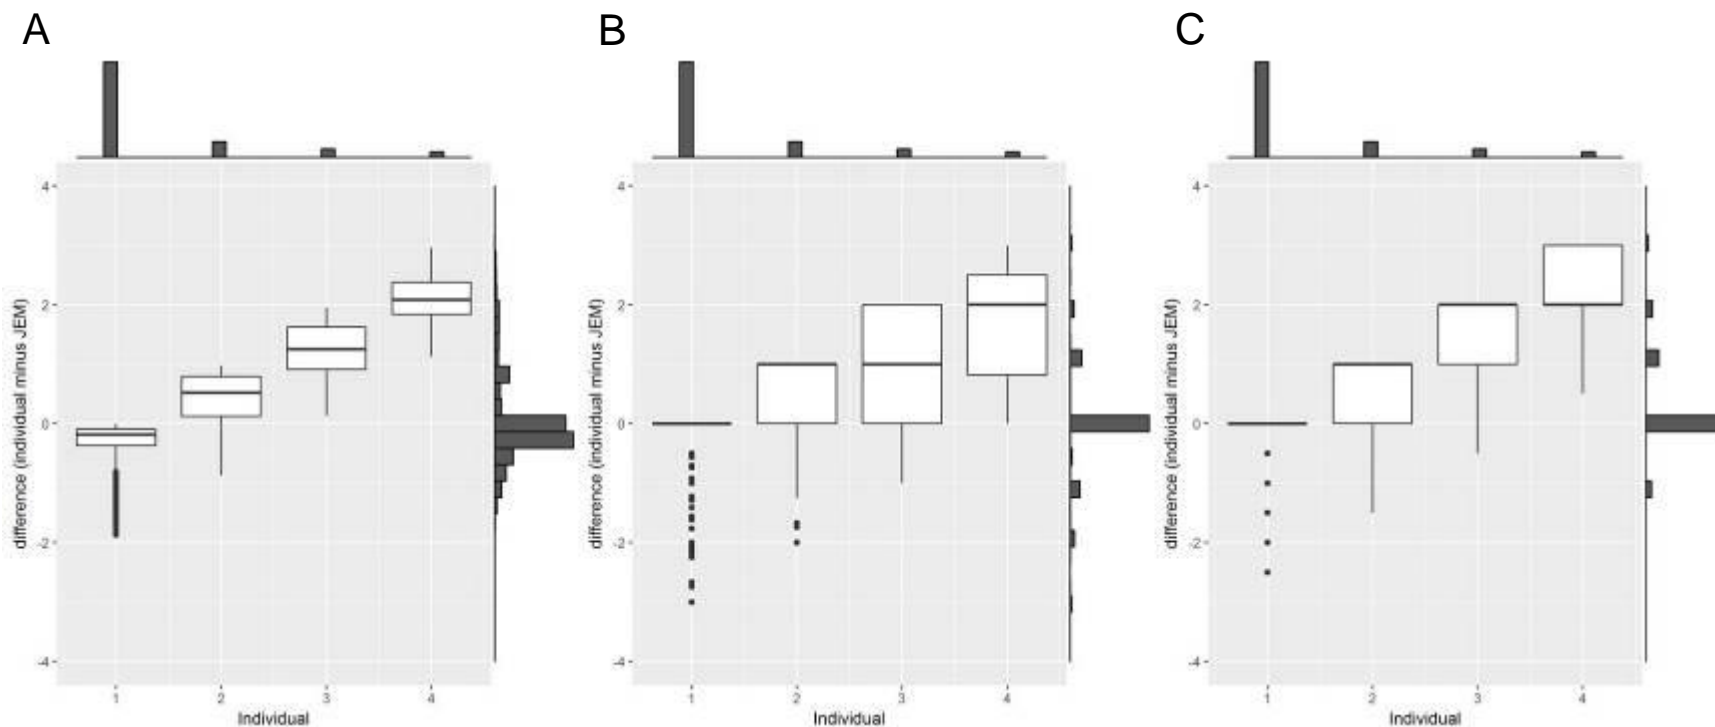

Supplement, Figure 21. Box-plots of the differences between individual-level reports and group-level exposure estimates (individual – JEM) at each exposure intensity level for three exposure metrics: (A) JEM Mean, (B) JEM Bias Corrected Mean, and (C) JEM Median. Distributions of individual (top axis) and JEM (right axis) are plotted. Bias-corrected mean determined using empirical quantile mapping methods (EQM). Exposure Variable: **Arms Abducted**

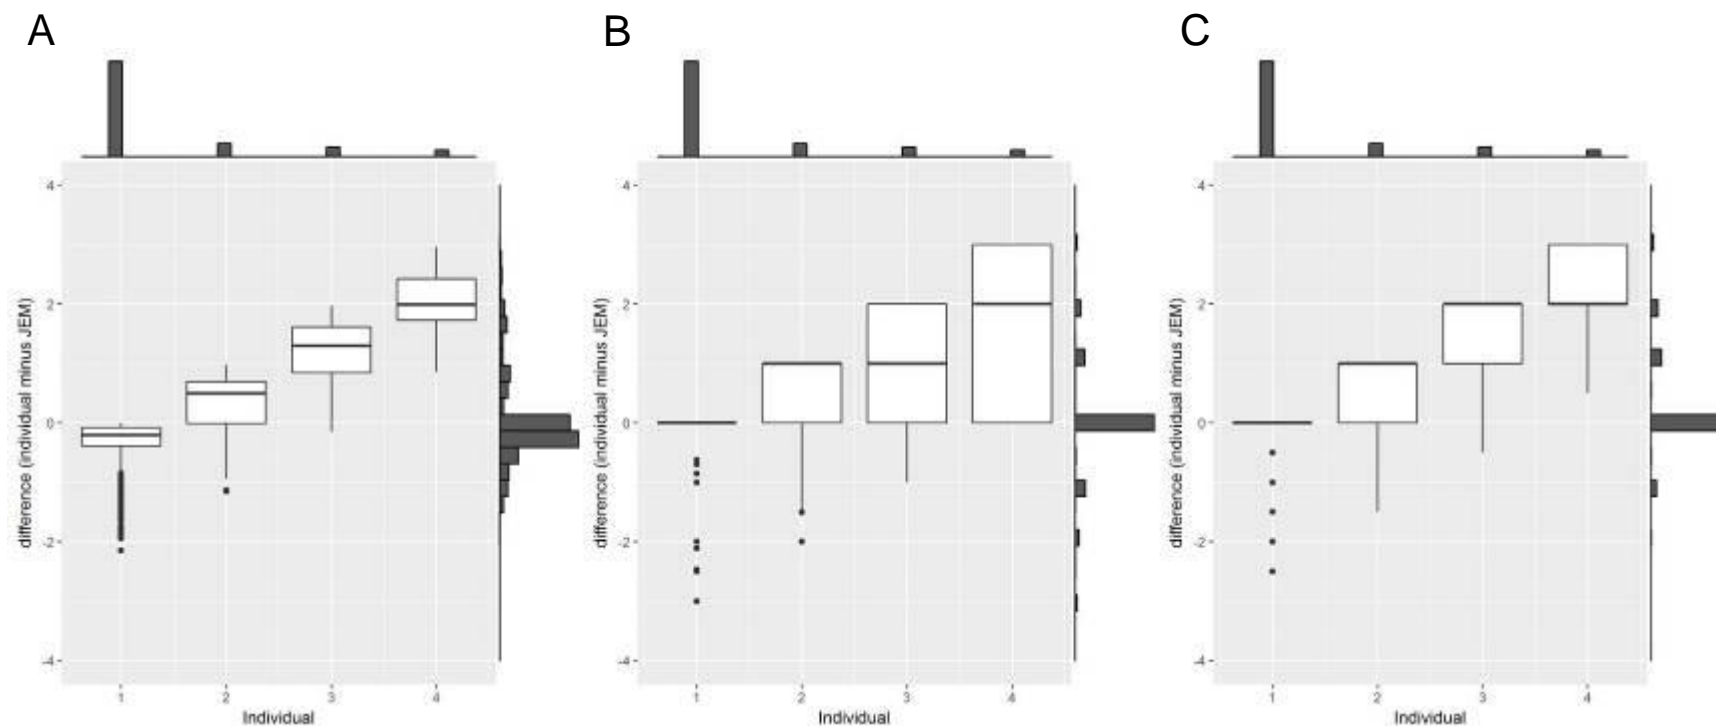

Supplement, Figure 22. Box-plots of the differences between individual-level reports and group-level exposure estimates (individual – JEM) at each exposure intensity level for three exposure metrics: (A) JEM Mean, (B) JEM Bias Corrected Mean, and (C) JEM Median. Distributions of individual (top axis) and JEM (right axis) are plotted. Bias-corrected mean determined using empirical quantile mapping methods (EQM). Exposure Variable: **Bend Elbow**



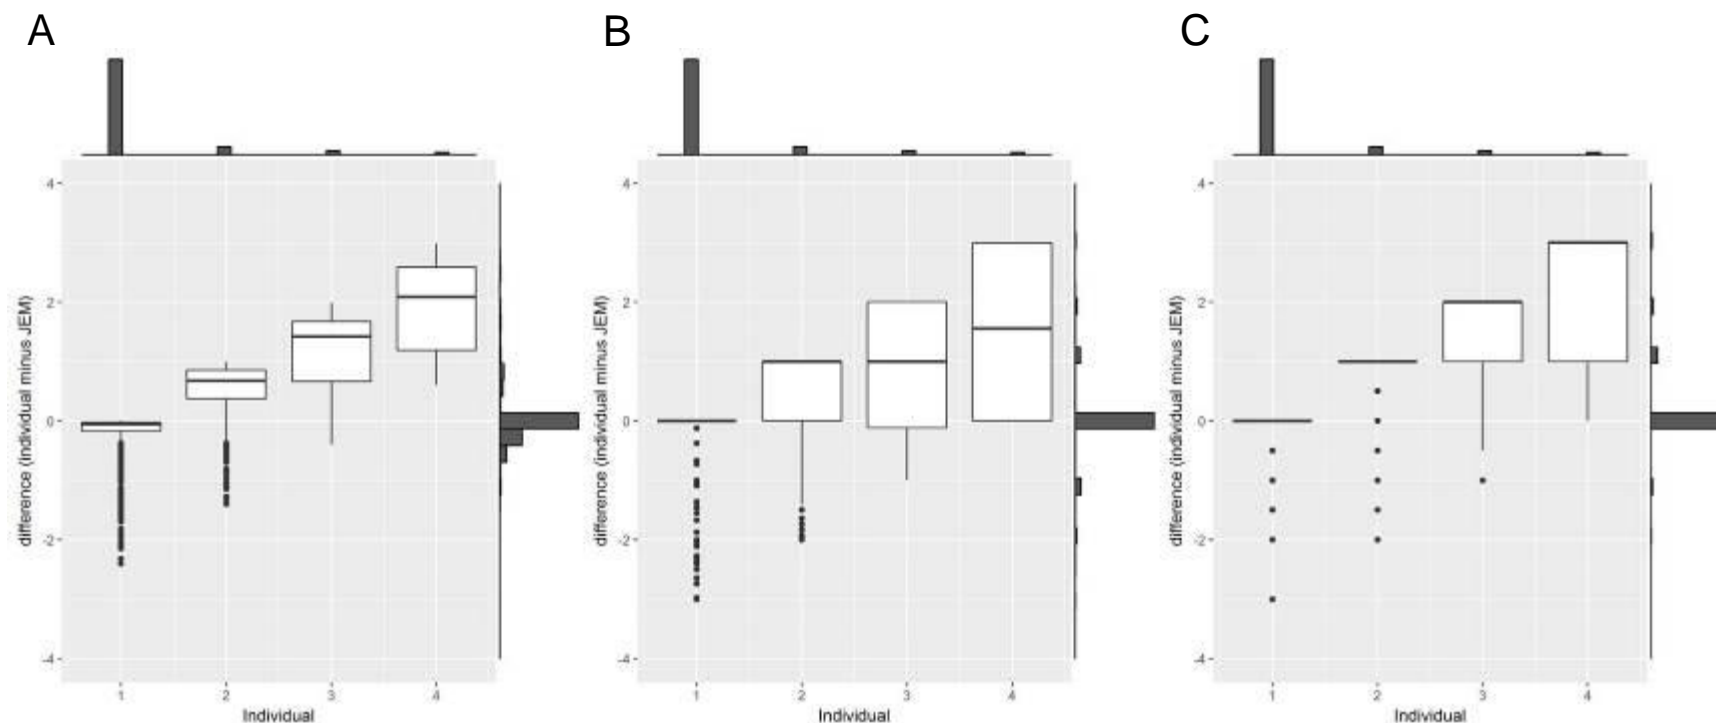

Supplement, Figure 23. Box-plots of the differences between individual-level reports and group-level exposure estimates (individual – JEM) at each exposure intensity level for three exposure metrics: (A) JEM Mean, (B) JEM Bias Corrected Mean, and (C) JEM Median. Distributions of individual (top axis) and JEM (right axis) are plotted. Bias-corrected mean determined using empirical quantile mapping methods (EQM). Exposure Variable: **Rotare Forearm**

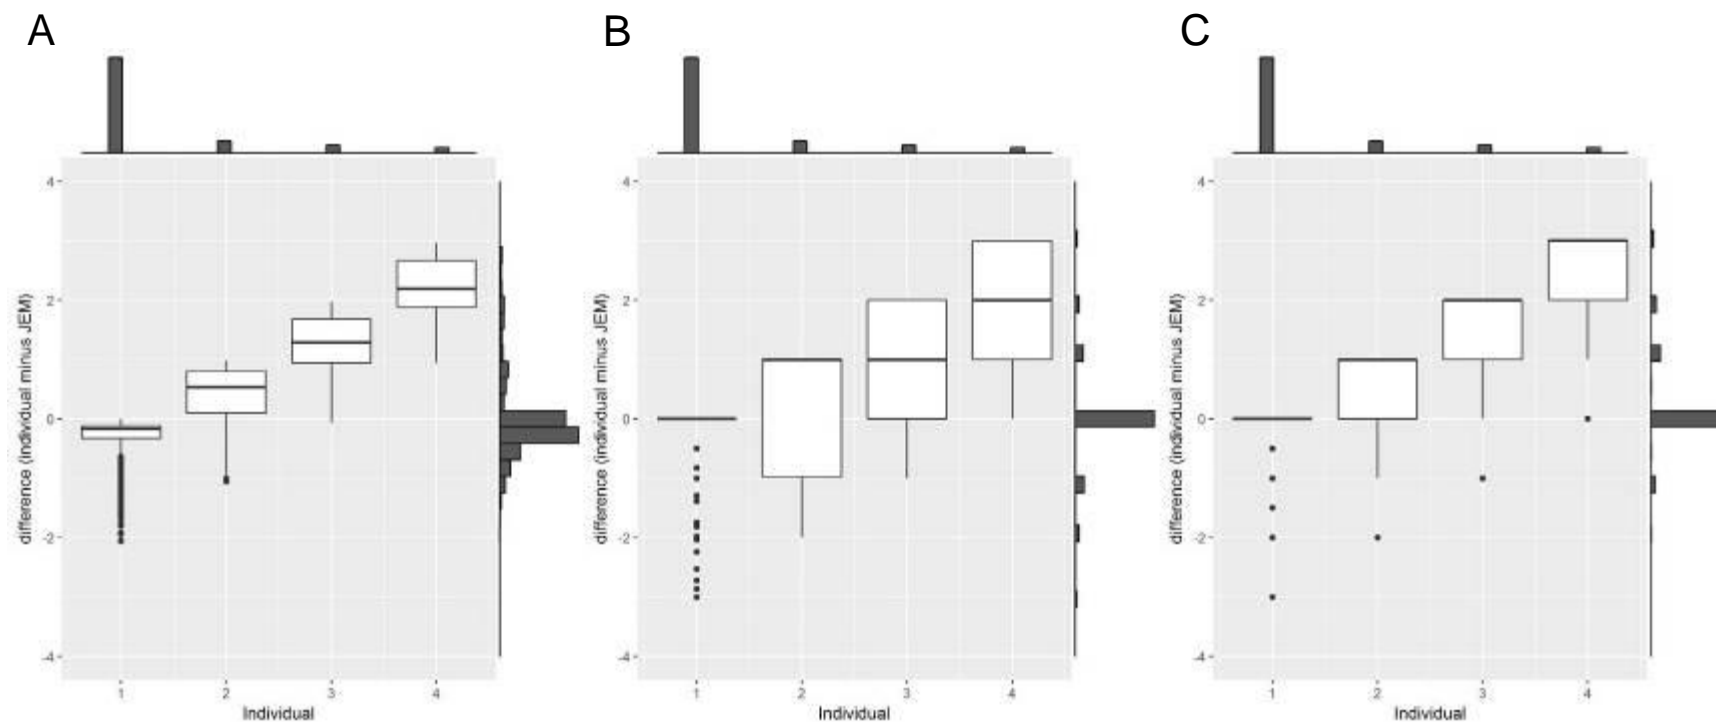

Supplement, Figure 24. Box-plots of the differences between individual-level reports and group-level exposure estimates (individual – JEM) at each exposure intensity level for three exposure metrics: (A) JEM Mean, (B) JEM Bias Corrected Mean, and (C) JEM Median. Distributions of individual (top axis) and JEM (right axis) are plotted. Bias-corrected mean determined using empirical quantile mapping methods (EQM). Exposure Variable: **Bend Wrist**

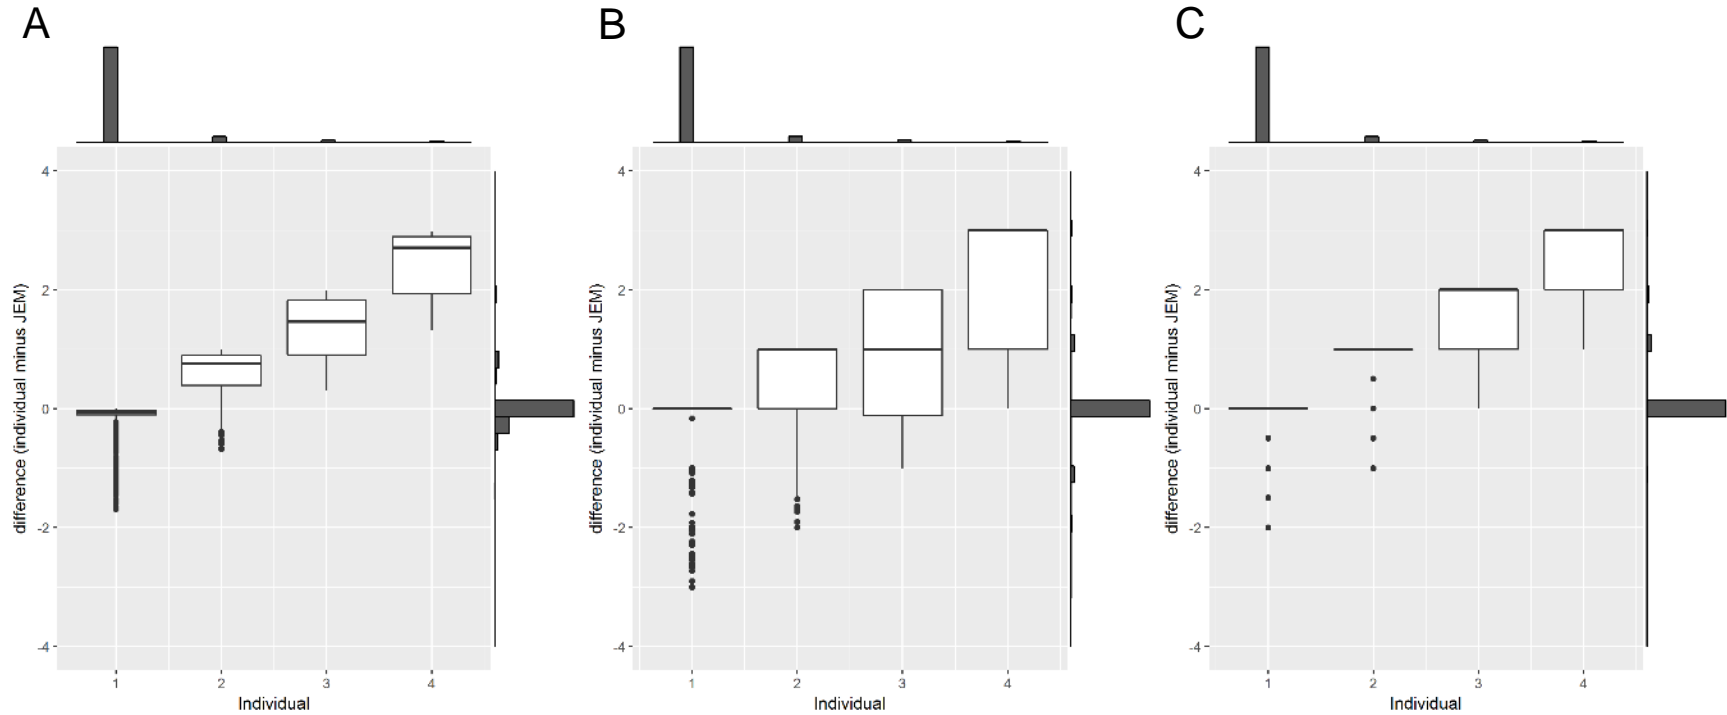

Supplement, Figure 25. Box-plots of the differences between individual-level reports and group-level exposure estimates (individual – JEM) at each exposure intensity level for three exposure metrics: (A) JEM Mean, (B) JEM Bias Corrected Mean, and (C) JEM Median. Distributions of individual (top axis) and JEM (right axis) are plotted. Bias-corrected mean determined using empirical quantile mapping methods (EQM). Exposure Variable: **Press Base or Hand**

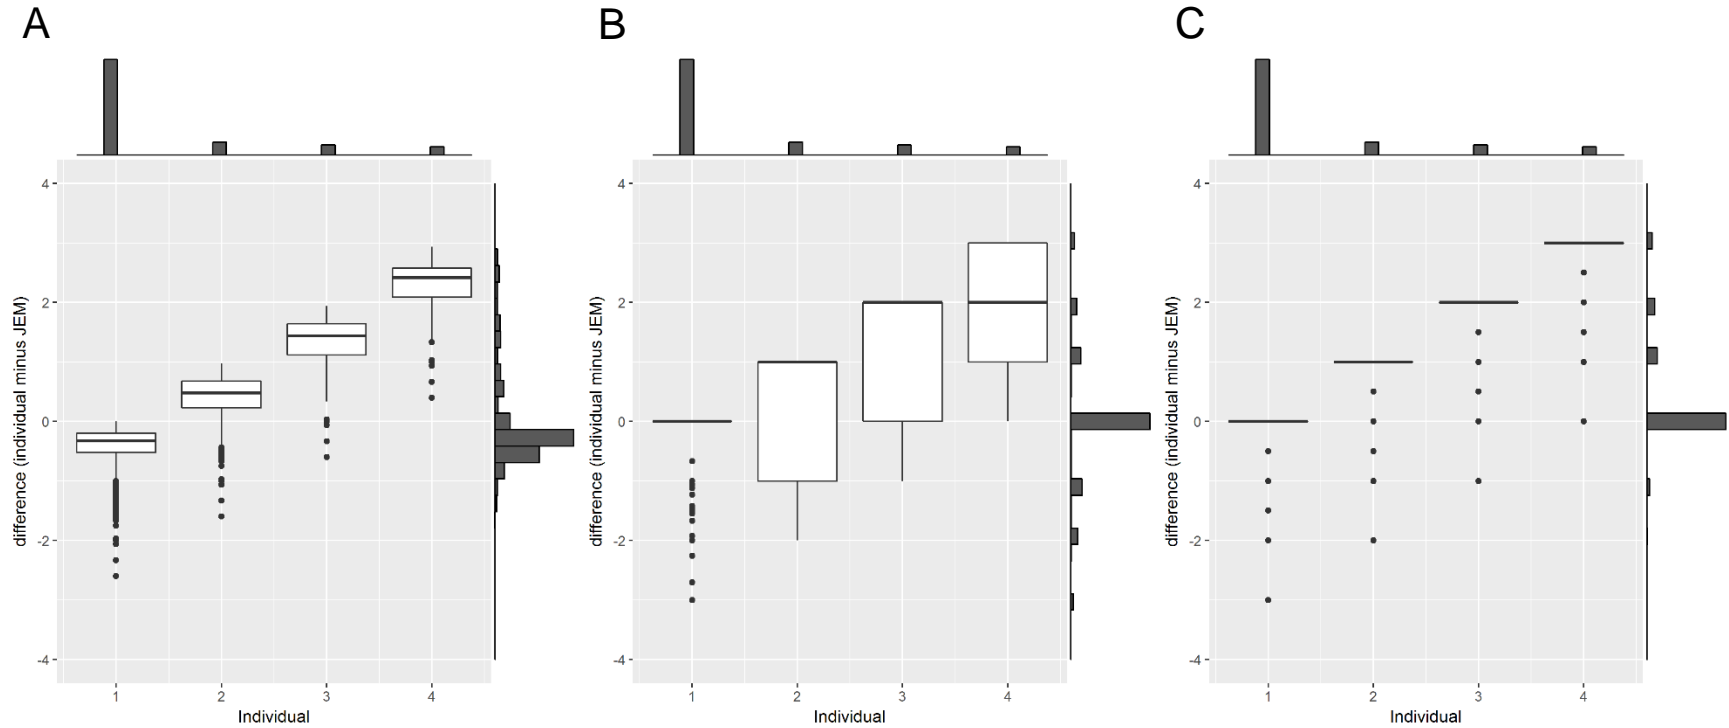

Supplement, Figure 26. Box-plots of the differences between individual-level reports and group-level exposure estimates (individual – JEM) at each exposure intensity level for three exposure metrics: (A) JEM Mean, (B) JEM Bias Corrected Mean, and (C) JEM Median. Distributions of individual (top axis) and JEM (right axis) are plotted. Bias-corrected mean determined using empirical quantile mapping methods (EQM). Exposure Variable: **Finger Pinch**

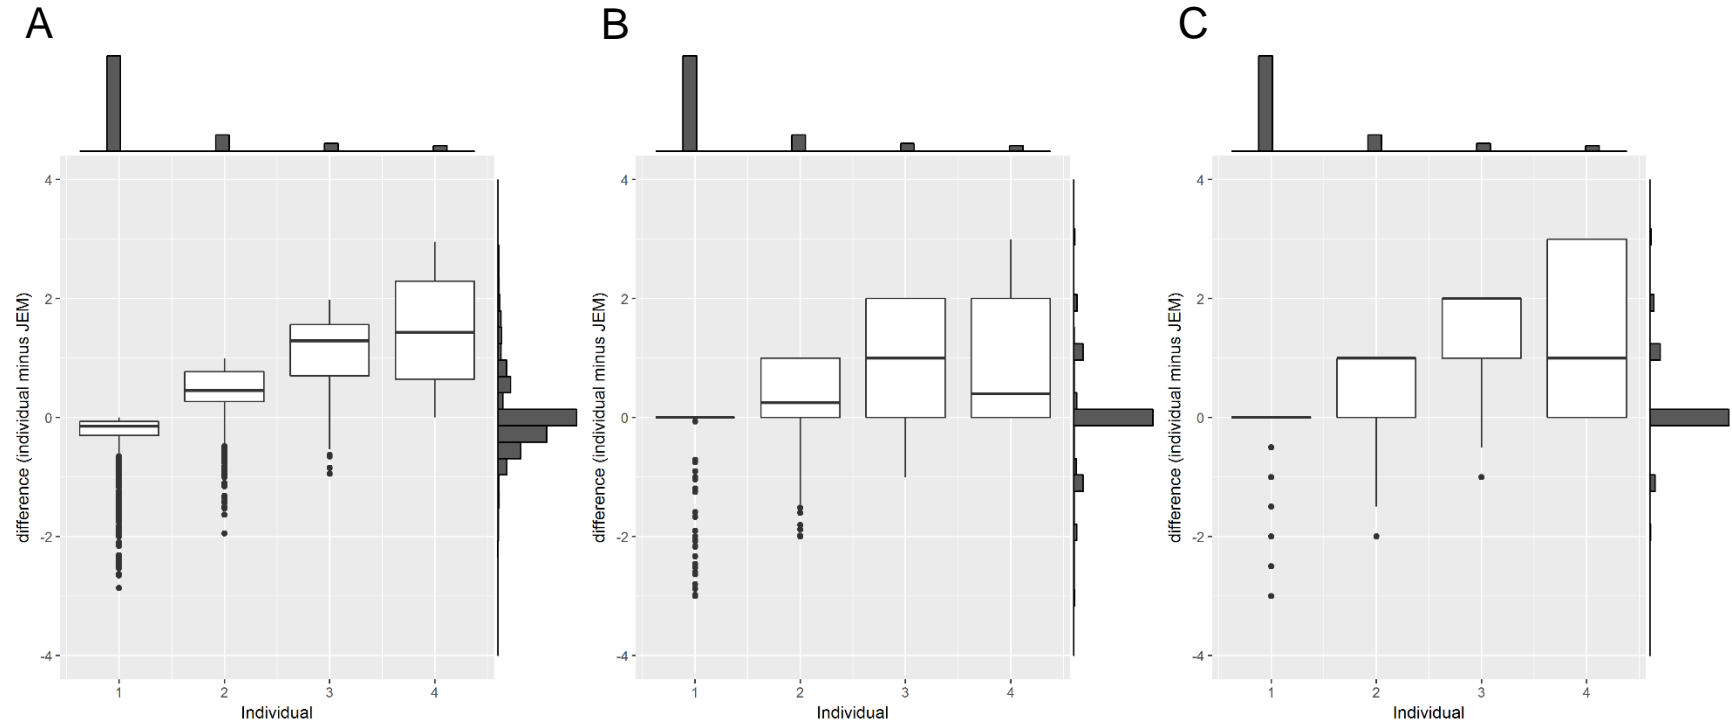

Supplement, Figure 27. Box-plots of the differences between individual-level reports and group-level exposure estimates (individual – JEM) at each exposure intensity level for three exposure metrics: (A) JEM Mean, (B) JEM Bias Corrected Mean, and (C) JEM Median. Distributions of individual (top axis) and JEM (right axis) are plotted. Bias-corrected mean determined using empirical quantile mapping methods (EQM). Exposure Variable: **Work Outdoors**
